# Supplementary material for: The Kitty Microbiome Project: Defining the Healthy Fecal “Core Microbiome” in Pet Domestic Cats
Source: MDPI journal article supplement (doi:10.3390/vetsci9110635), 2022-11-16

## **SUPPLEMENTARY FIGURES FOR:**

### **The Kitty Microbiome Project: Defining the Healthy Fecal “Core Microbiome” in Pet Domestic Cats**

Holly H. Ganz<sup>1,\*</sup>, Guillaume Jospin<sup>1</sup>, Connie A. Rojas<sup>2</sup>, Alex L. Martin<sup>1</sup>, Katherine Dahlhausen<sup>1</sup>, Dawn D. Kingsbury<sup>1</sup>, Carlton X. Osborne<sup>1</sup>, Zhandra Entrolezo<sup>1</sup>, Syd Redner<sup>1</sup>, Bryan Ramirez<sup>1</sup>, Jonathan A. Eisen<sup>2</sup>, Madeleine Leahy<sup>2</sup>, Chase Keaton<sup>2</sup>, Janine Wong<sup>2</sup>, Jennifer Gardy<sup>3</sup>, Jessica K. Jarett<sup>1</sup>

<sup>1</sup> AnimalBiome, 400 29th Street, Suite 101, Oakland, CA 94609, USA

<sup>2</sup> Department of Evolution and Ecology, University of California, Davis, CA 95616, USA

<sup>3</sup> Bill & Melinda Gates Foundation, Seattle, WA 98109, USA

#### **Name and email address of corresponding author:**

Holly H. Ganz (holly@animalbiome.com)

#### **List of Supplemental Figures**

**Figure S1** Histograms of core genera abundances across samples

**Figure S2** Bacterial genera differentially abundant among age classes

**Figure S3** Bacterial genera differentially abundant among diet components

**Figure S4** Heatmap of taxa used by Random Forest for differentiating among diet types

**Figure S5** Heatmap of taxa used by Random Forest to distinguish FIV + and FIV - shelter cats from healthy house cats

**Figure S1. Distributions of the relative abundances of thirty core bacterial genera in healthy pet cats.** These were bacterial genera that were found in at least 55% of samples at a threshold of at least 25 reads per sample.

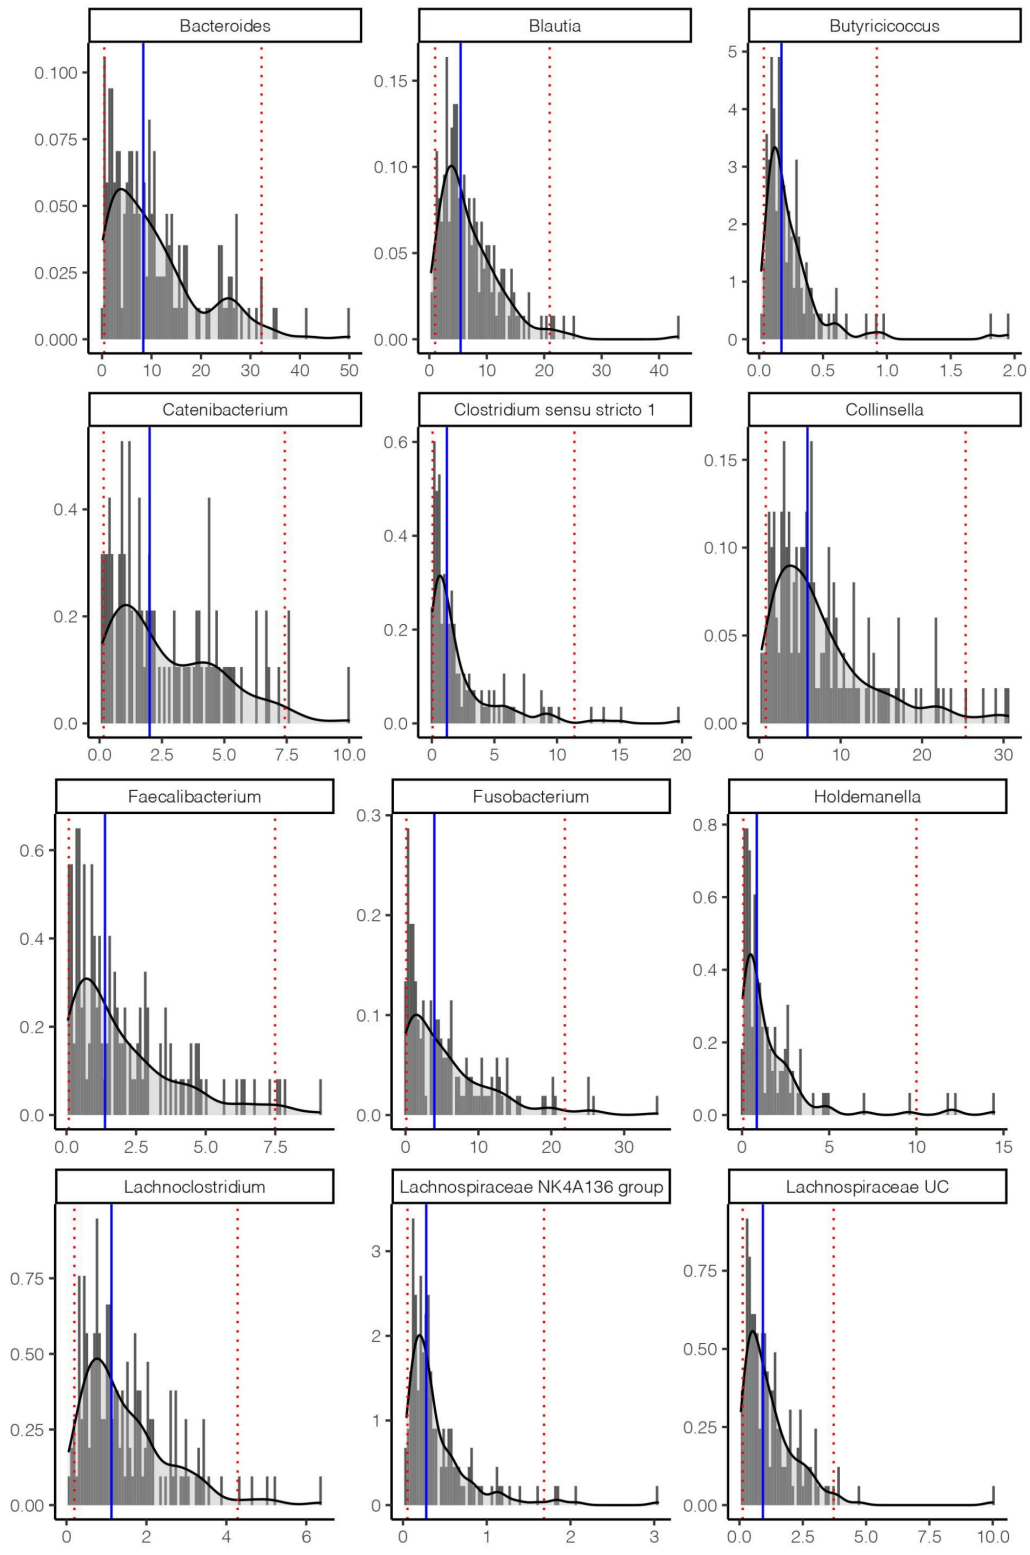

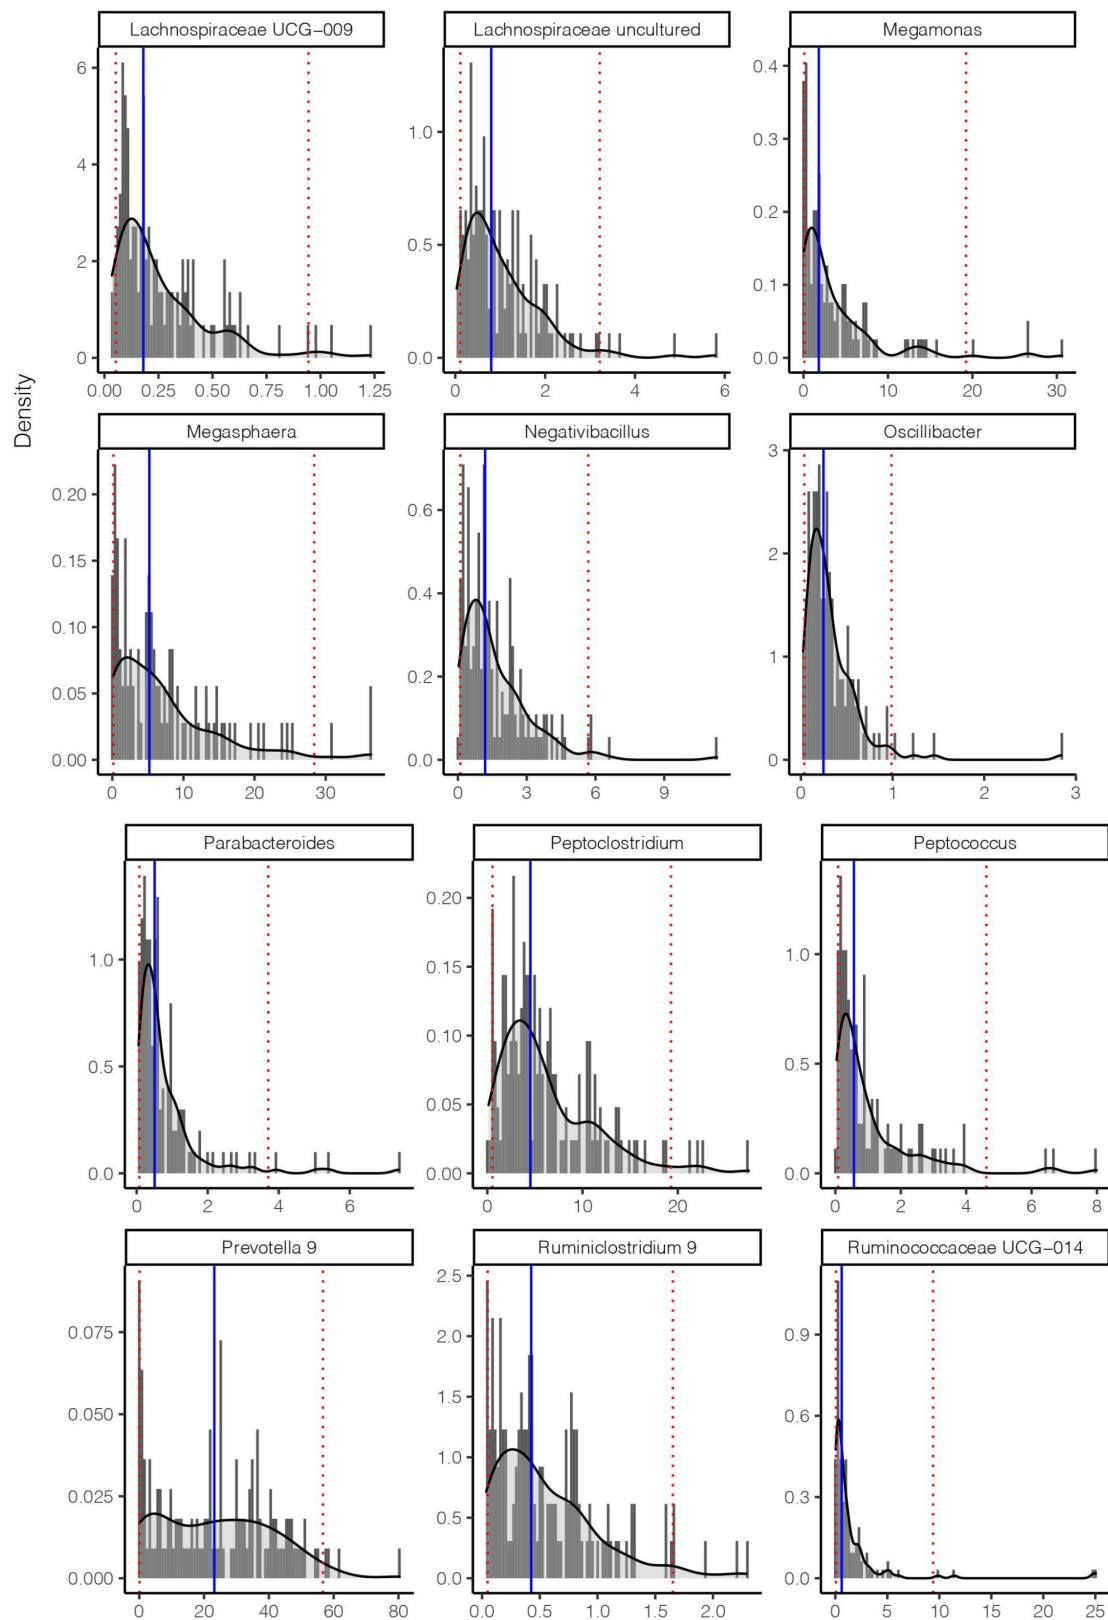

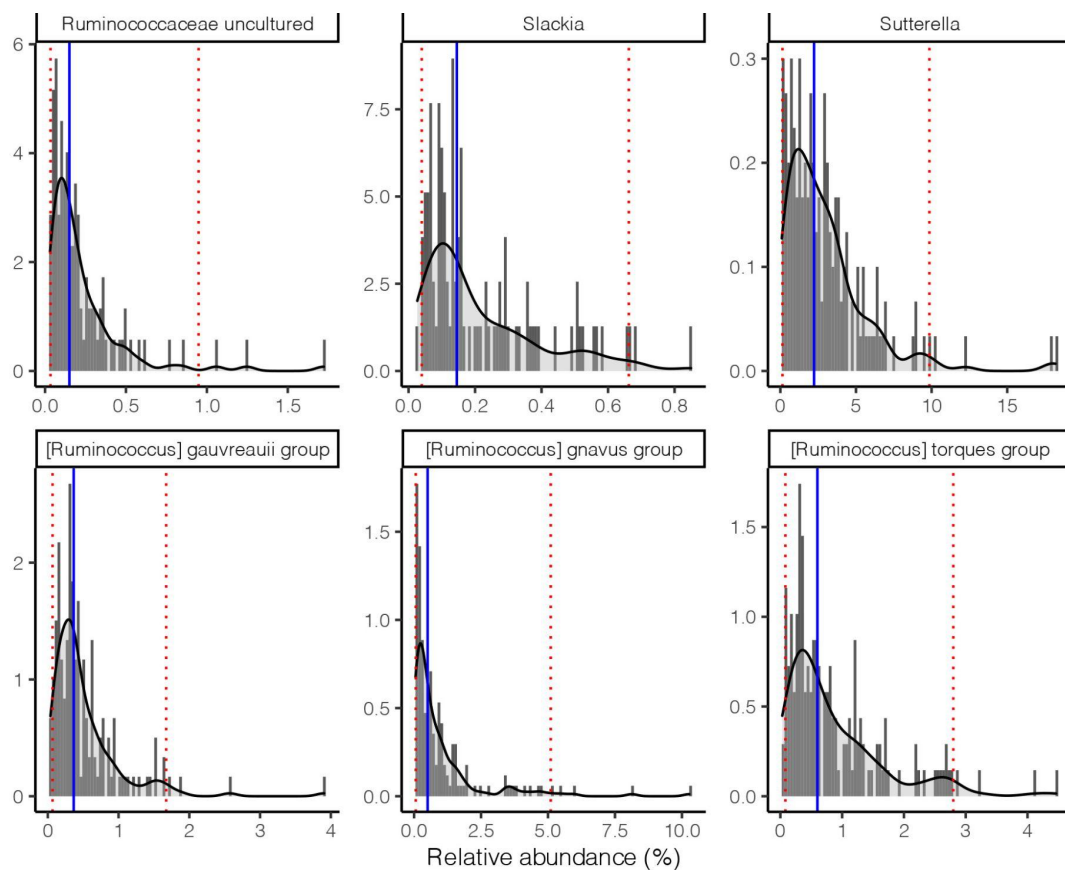

**Figure S2. Three bacteria genera were found at lower relative abundances in older healthy cats compared to younger cats.** We used MaAsLin2 for the analyses, set alpha to 0.05, and adjusted p.values for multiple comparisons using FDR.

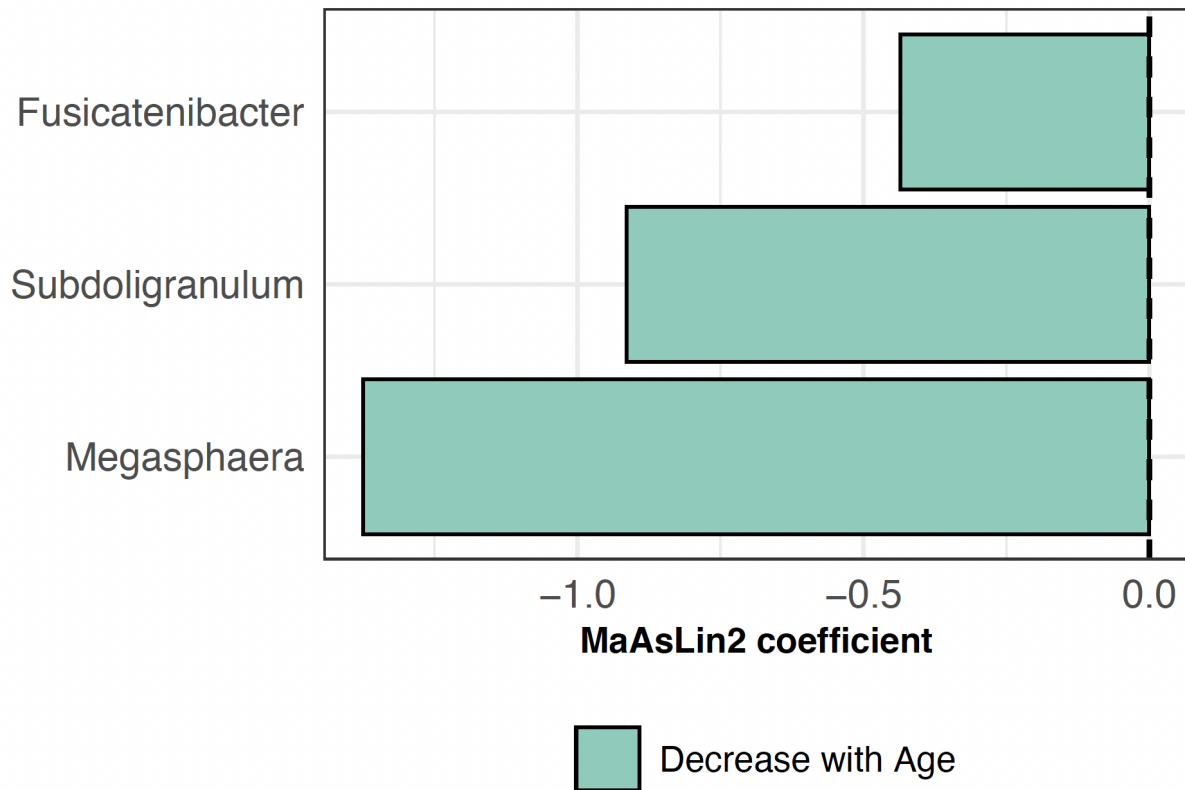

**Figure S3. Bacterial genera enriched in the fecal microbiomes of cats that include dry food, raw food, or wet food in their diets.** We used MaAsLin2 for the analyses, set alpha to 0.05, and adjusted p.values for multiple comparisons using FDR.

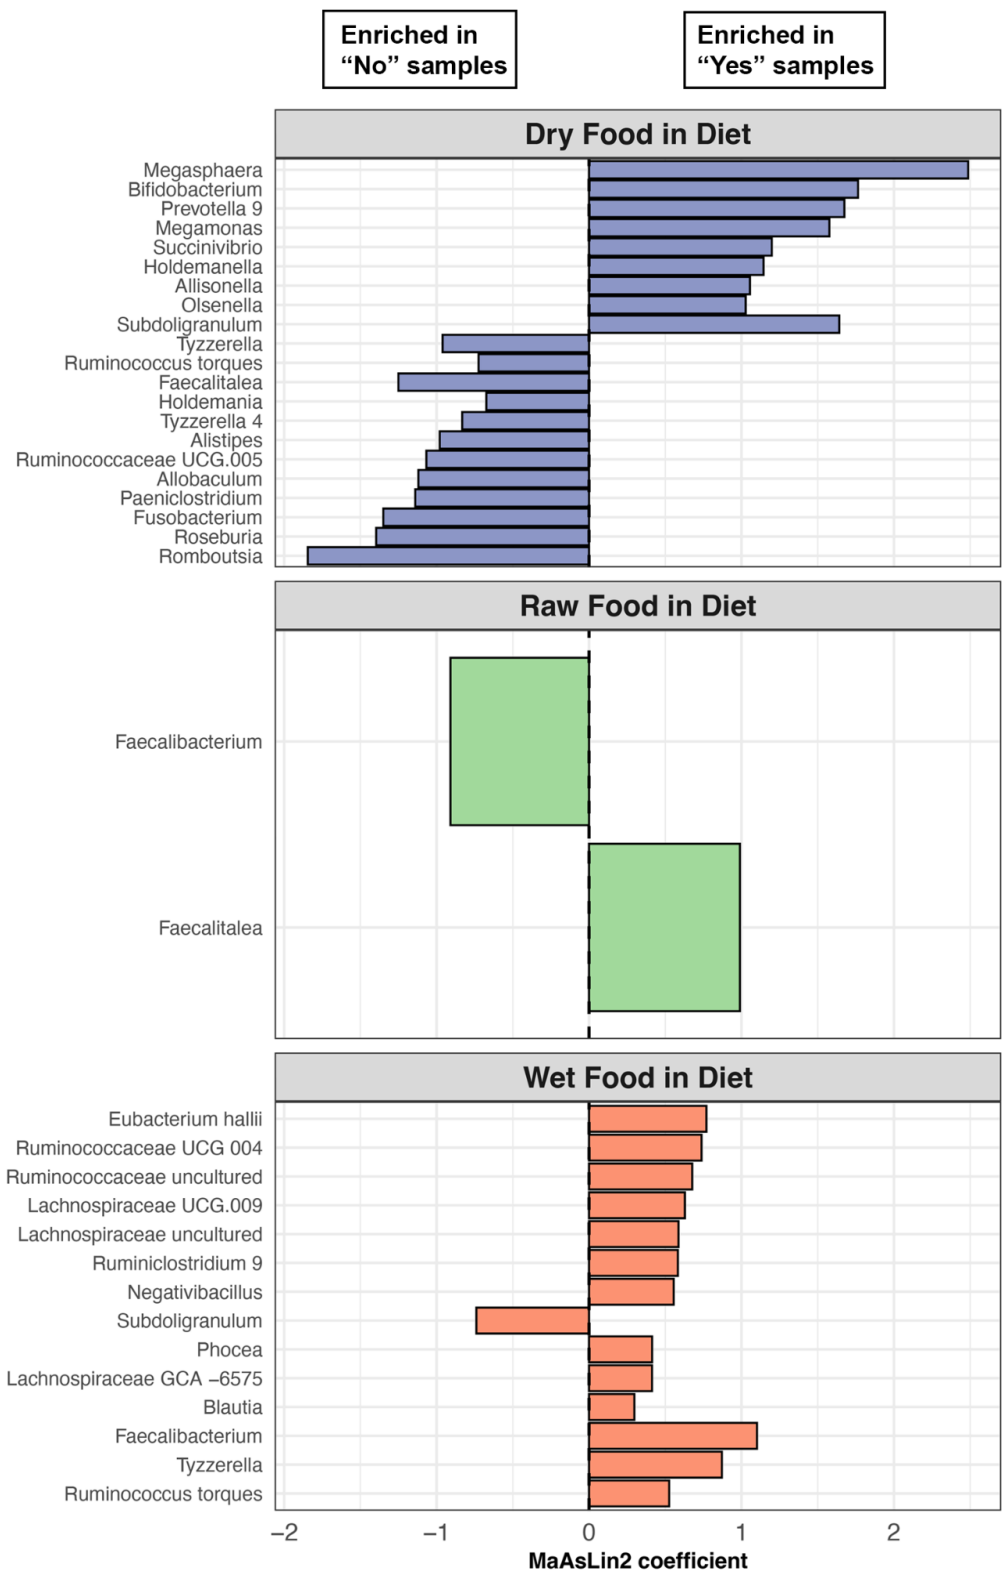

**Figure S4. Random forest classifier accurately distinguished the fecal microbiomes of cats that include dry food in their diet from those that do not.** Heatmap showing the logged frequencies of 24 bacterial genera by diet component. The 24 bacterial genera comprised half of the model's importance.

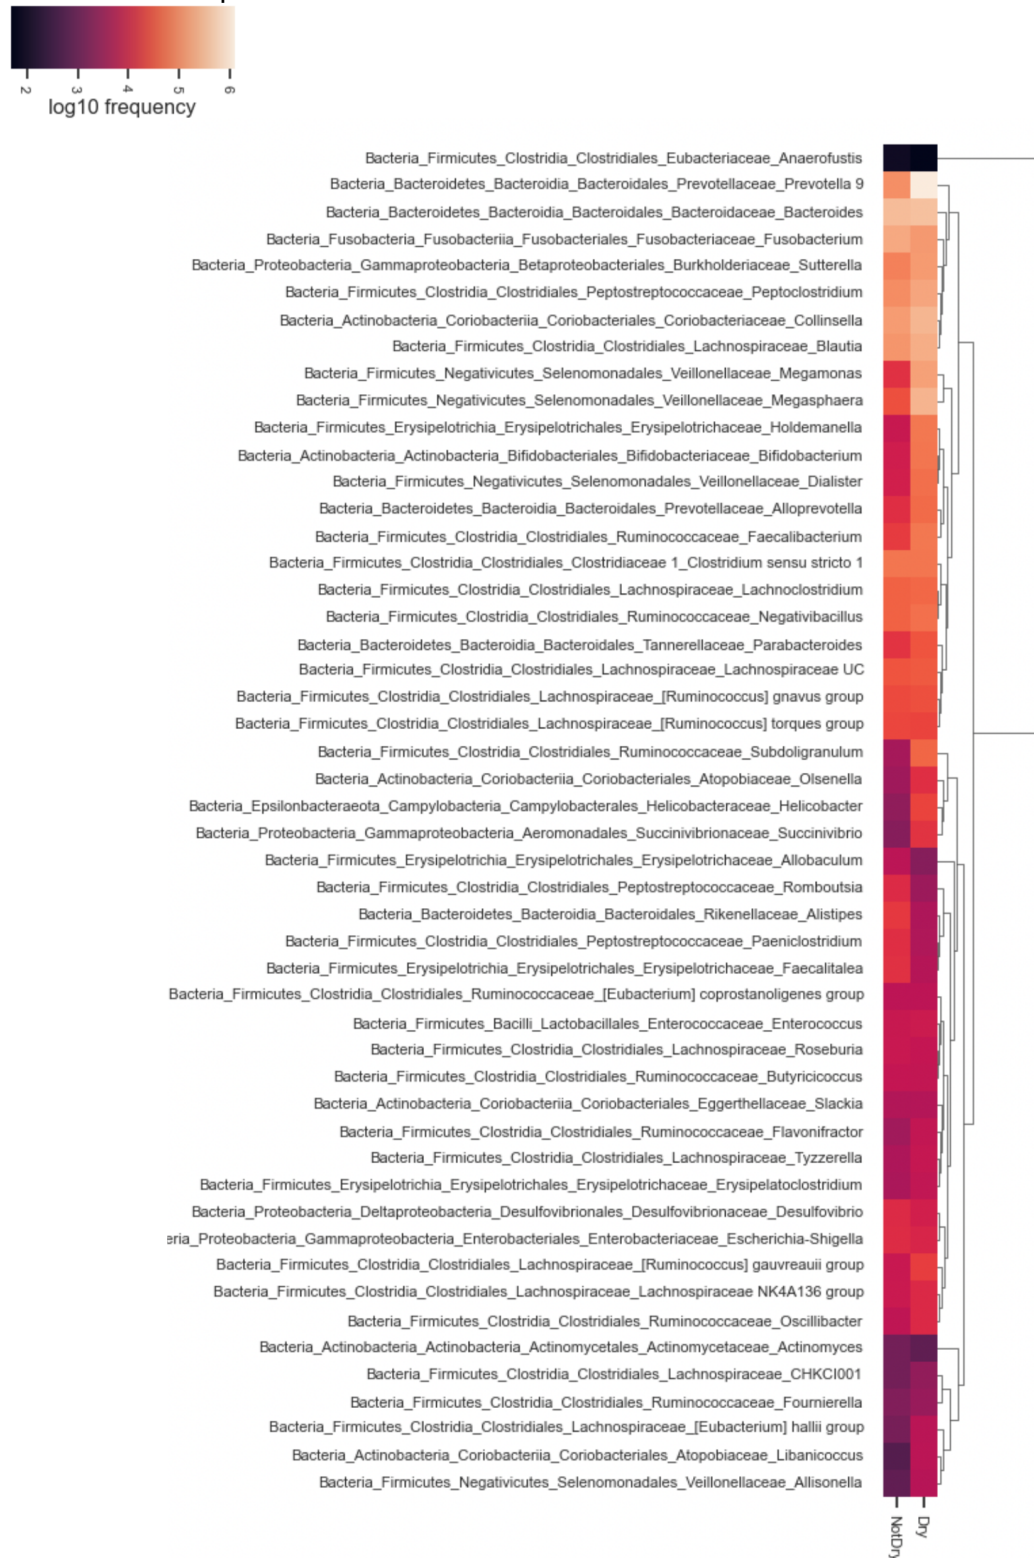



**Figure S5. Random forest classifier accurately distinguished the fecal microbiomes of healthy house cats from those of FIV negative and FIV positive shelter cats.** Heatmap showing the logged frequencies of 27 bacterial genera by living environment and FIV status. The 27 bacterial genera comprised half of the model's importance.

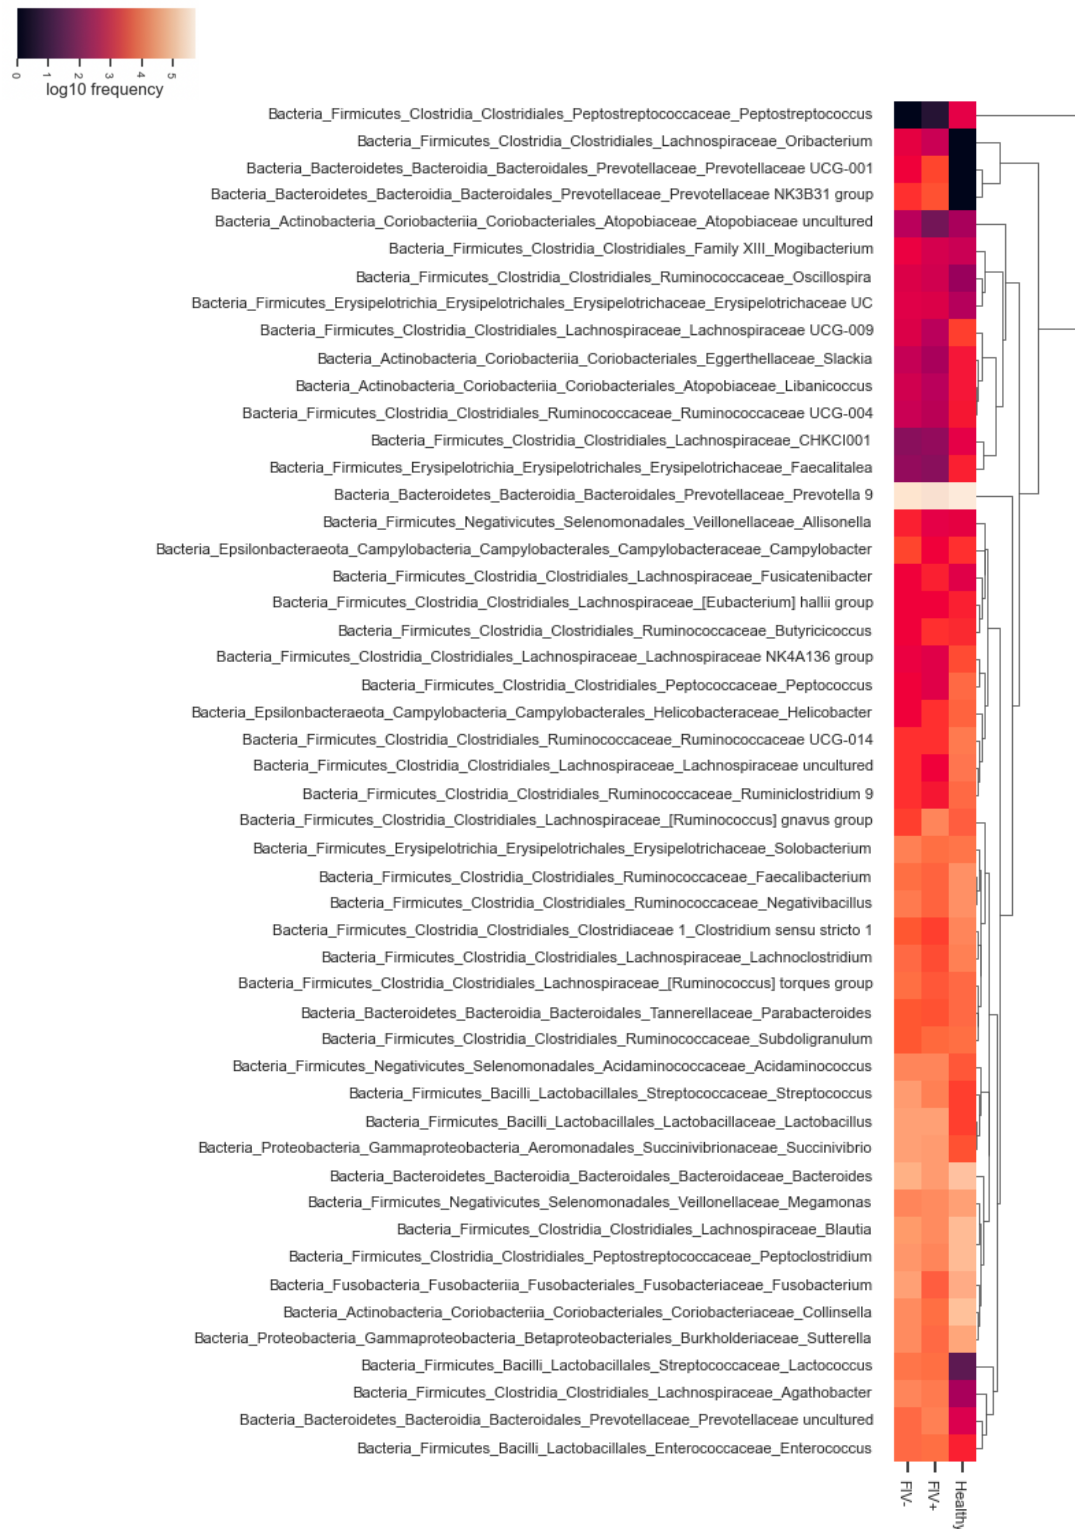

Supplement: s1 [file s1]
