# Supplementary material for: The Kitty Microbiome Project: Defining the Healthy Fecal “Core Microbiome” in Pet Domestic Cats
Source: Vet Sci. 2022 Nov 16;9(11):635. doi: 10.3390/vetsci9110635 (PMC9698023; doi:10.3390/vetsci9110635)
Supplement: Supplementary file 1 [file vetsci-09-00635-s001.zip › vetsci-1975773-Supplementary Tables.xlsx]

## Sheet: About
							SUPPLEMENTARY TABLES FOR:
							The Kitty Microbiome Project: Defining the Healthy Fecal “Core Microbiome” in Pet Domestic Cats
			Holly H. Ganz1,*, Guillaume Jospin1, Connie A. Rojas2, Alex L. Martin1, Katherine Dahlhausen1
			Dawn D. Kingsbury1, Carlton X. Osborne1, Zhandra Entrolezo1, Syd Redner1, Bryan Ramirez1
			Jonathan A. Eisen2, Madeleine Leahy2, Chase Keaton2, Janine Wong2, Jennifer Gardy3, Jessica K. Jarett1
							1 AnimalBiome, 400 29th Street, Suite 101, Oakland, CA 94609, USA
						2 Department of Evolution and Ecology, University of California, Davis, CA 95616, USA
						3 Bill & Melinda Gates Foundation, Seattle, WA 98109, USA
							Name and email address of corresponding author:
							Holly H. Ganz (holly@animalbiome.com)
List of Supplementary Tables
Table S1	Cat characteristics broken down by age class
Table S2	Alpha-diversity models ~ age class
Table S3	MaAsLin2 results ~ age class
Table S4	Cat characteristics broken down by diet component
Table S5	Core microbiome metrics ~ diet component
Table S6	Alpha-diversity models ~ diet component
Table S7	PERMANOVA and PERMDISP ~ diet component
Table S8	MaAsLin2 results ~ diet component
Table S9	QIIME2 random forest classifier output ~ diet component
Table S10	Cat characteristics broken down by living environment and FIV status (+ vs. -)
Table S11	Core microbiome metrics ~ environment and FIV status
Table S12	Alpha-diversity models ~ environment and FIV status
Table S13	QIIME2 random forest classifier output ~ environment

## Sheet: Table S1
Table S1. Sample sizes, cat characteristics, and alpha-diversity values by age group (mean ± SD).
Not all samples had every piece of metadata, hence the missing values.
Variables	Junior	Prime	Mature	Senior
Sample sizes	58	59	44	6
Age (Years)	1.8 (± 0.71)	4.9 (± 1.27)	9.1 (± 1.32)	11.8 (± 0.36)
Fecal Score (51 Missing Values)	2.7 (± 1.04)	2.7 (± 0.95)	3.1 (± 0.99)	3.2 (± 0.5)
Body Condition Score (22 Missing Values)	5.2 (± 0.38)	5 (± 0.61)	5.1 (± 0.56)	5.6 (± 0.55)
Female (%)	47	61	59	50
Neutered (%)	95	86	93	83
Mean Observed Richness	58.62 (± 11.27)	57.02 (± 10.811)	54.5 (± 14.631)	50 (± 12.231)
Shannon	2.637 (± 0.376)	2.691 (± 0.353)	2.619 (± 0.391)	2.584 (± 0.366)
Gini-Simpson	0.85 (± 0.071)	0.868 (± 0.068)	0.86 (± 0.066)	0.854 (± 0.074)
Evenness	0.649 (± 0.075)	0.667 (± 0.073)	0.66 (± 0.075)	0.665 (± 0.084)

## Sheet: Table S2
Table S2. Gut microbiome alpha-diversity does not vary with age in domestic cats.
Linear models tested whether one of four metrics of alpha-diversity (Observed genera, Shannon diversity,
Gini-Simpson index, and Pielou’s Evenness) was correlated with host age (months).
Output from linear model is shown below. Beta Estimates appear on top cell and SE values are inside parentheses in the cell below.
Asterisks denote statistical significance (**p<0.05, ***p<0.01)
Variable	Observed	Shannon	Gini Simpson	Pielou’s Evenness
Age (mos)	-0.33	0.003	0.002	0.002
	(-0.332)	(-0.009)	(-0.002)	(-0.002)
Intercept	63.893***	2.637***	0.849***	0.635***
	-2.034	-0.053	-0.01	-0.011
Sample sizes	167	167	167	167
R2	0.006	0.001	0.009	0.008
Adjusted R2	-0.0001	-0.005	0.003	0.002
Residual Std. Error	14.128	0.369	0.068	0.076
F Statistic	0.991	0.139	1.444	1.343

## Sheet: Table S3
Table S3. Bacterial genera that are differentially abundant among age classes as determined by MaAsLin2.
Briefly, unrarified relative abundance data was normalized with total sum scaling, log transformed,
and all genera at a minimum prevalence of 10% and minimum relative abundance of 0.1% in all
samples were analyzed with linear models that set age as a continuous predictor. Statistically
significant genera (a=0.05) after adjusting p-values for multiple comparisons are shown below.
Bacterial Genera	Variable	coefficient	standard.error	N	N.not.0	p.value	adj.p.value (i.e. q.value)
Bacteria_Firmicutes_Clostridia_Clostridiales_Lachnospiraceae_Fusicatenibacter	age_at_sampling_months	-0.435489	0.122036	168	24	0.000469545	0.0255549
Bacteria_Firmicutes_Clostridia_Clostridiales_Ruminococcaceae_Subdoligranulum	age_at_sampling_months	-0.91405	0.264305	168	110	0.000690673	0.0255549
Bacteria_Firmicutes_Negativicutes_Selenomonadales_Veillonellaceae_Megasphaera	age_at_sampling_months	-1.37481	0.386877	168	108	0.000494985	0.0255549

## Sheet: Table S4
Table S4. Sample sizes, cat characteristics, and alpha-diversity values by diet type (mean ± SD).
Not all samples had every piece of metadata, hence the missing values.
Variables	Dry	Raw	Wet	Wet+Dry	Wet+Dry+Raw	Wet+Raw
N	20	16	11	63	8	8
Age (Years)	4.3 (+/- 2.54)	4.4 (+/- 3.45)	8.4 (+/- 3.49)	5.4 (+/- 3.1)	6.4 (+/- 3.15)	7.2 (+/- 3.03)
Fecal Score (20 Missing Values)	3.1 (+/- 1.29)	2.7 (+/- 1.03)	3.1 (+/- 0.54)	2.8 (+/- 0.95)	3 (+/- 1.15)	2.8 (+/- 1.17)
Body Condition Score (22 Missing Values)	4.7 (+/- 0.57)	4.9 (+/- 0.57)	5.3 (+/- 0.5)	5.3 (+/- 0.53)	5 (+/- 0.76)	5.2 (+/- 0.46)
Female (%)	60	56	18	56	62	62
Neutered (%)	95	88	100	92	88	100
Richness (Observed)	52.3 (+/- 10.037)	53.69 (+/- 15.84)	64.36 (+/- 11.885)	56.67 (+/- 11.115)	55.5 (+/- 9.227)	55.12 (+/- 10.986)
Shannon	2.406 (+/- 0.411)	2.613 (+/- 0.336)	2.831 (+/- 0.351)	2.634 (+/- 0.399)	2.644 (+/- 0.248)	2.978 (+/- 0.201)
Gini-Simpson	0.814 (+/- 0.086)	0.868 (+/- 0.041)	0.876 (+/- 0.087)	0.854 (+/- 0.072)	0.871 (+/- 0.048)	0.921 (+/- 0.017)
Evenness	0.61 (+/- 0.087)	0.661 (+/- 0.047)	0.682 (+/- 0.076)	0.654 (+/- 0.08)	0.66 (+/- 0.056)	0.747 (+/- 0.027)

## Sheet: Table S5
Table S5. Linear model output relating core gut microbiome metrics to three diet variables.
The two core microbiome metrics were a) the percentage of the microbiome that is comprised by core bacterial genera,
and b) the number of core bacterial genera present (out of 30 total). The three diet variables were i) includes dry food in their diet (Y vs. N)
ii) includes wet food in their diet (Y vs. N), and iii) includes raw food in their diet (Y vs. N).
Beta Estimates appear on top cell and SE values are inside parentheses in the cell below.
Asterisks denote statistical significance (**p<0.05, ***p<0.01)
Diet variable	Core Microbiome Sum	Core Microbiome Taxa Present (out of 30)
Dry	0.037**	0.037
	(-0.018)	(-0.025)
Wet	-0.012	0.034
	(-0.014)	(-0.02)
Raw	0.006	-0.057**
	(-0.018)	(-0.026)
(Intercept)	0.815***	0.846***
	(-0.02)	(-0.028)
Observations	126	126
R2	0.046	0.172
Adjusted R2	0.022	0.152
Residual Std. Error (df=122)	0.069	0.098
F Statistic (df=3; 122)	1.956	8.450***

## Sheet: Table S6
Table S6. Linear model output relating gut microbiome alpha-diversity three diet variables.
Four metrics of microbiome alpha-diversity (Observed Richness, Shannon diversity, Gini-Simpson index, and
Pielou's Evenness) were correlated with three diet variables: dry food in diet (Y vs. N), wet food in diet (Y vs. N),
and raw food in diet (Y vs. N). Beta Estimates appear on top cell and SE values are inside parentheses in the cell below.
Asterisks denote statistical significance (**p<0.05, ***p<0.01)
Diet variable	Observed	Shannon	Gini Simpson	Pielou’s Evenness
Dry	-5.383	-0.217**	-0.03	-0.040**
	(-2.934)	(-0.094)	(-0.018)	(-0.019)
Wet	4.578	0.252***	0.040***	0.049***
	(-2.386)	(-0.076)	(-0.014)	(-0.015)
Raw	-4.23	0.038	0.027	0.023
	(-3.053)	(-0.098)	(-0.018)	(-0.02)
(Intercept)	57.787***	2.601***	0.843***	0.645***
	(-3.291)	(-0.105)	(-0.02)	(-0.021)
Observations	126	126	126	126
R2	0.056	0.121	0.116	0.135
Adjusted R2	0.033	0.1	0.094	0.114
Residual Std. Error (df=122)	11.585	0.371	0.069	0.074
F Statistic (df=3; 122)	2.434	5.623***	5.345***	6.347***

## Sheet: Table S7
Table S7. Gut microbiome beta-diversity varies with host dietary category.
top) PERMANOVA output of models that tested whether gut microbiome beta-diversity (Bray-Curtis dissimilarity)
varied with host diet. Three diet variables were: dry food in diet (Y vs. N), wet food in diet (Y vs. N), and raw food
in diet (Y vs. N). bottom) PERMDISP output of models that tested whether gut microbiome dispersion
varied among diet types.
PERMANOVA
Diet variable	Df	SumOfSqs	R2	F	Pr(>F)
Dry	1	1.30986	0.0575585	8.45206	0.001
Wet	1	0.477793	0.0209954	3.08303	0.016
Raw	1	0.427672	0.018793	2.75961	0.014
Residual	122	18.907	0.830819
Total	125	22.757	1
PERMDISP (dispersion)
Diet variable	Df	SumOfSqs	R2	F	Pr(>F)
Dry	1	1.30986	0.0575585	8.45206	0.001
Wet	1	0.477793	0.0209954	3.08303	0.016
Raw	1	0.427672	0.018793	2.75961	0.014
Residual	122	18.907	0.830819
Total	125	22.757	1

## Sheet: Table S8
Table S8. Bacterial genera that are differentially abundant among diet types as determined by MaAsLin2.
Briefly, unrarified relative abundance data was normalized with total sum scaling, log transformed,
and all genera at a minimum prevalence of 10% and minimum relative abundance of 0.1% in all
samples were analyzed with linear models that set three diet variables as predictors.
The diet variables were: eats dry food (Y vs. N), eats wet food (Y vs. N), or eats raw food (Y vs. N).
Statistically significant genera (a=0.05) after adjusting p-values for multiple comparisons are shown below.
Bacterial Genera	part_of_core?	Variable	coefficient	standard.error	N	N.not.0	p.value	adj.p.value (i.e. q.value)
Bacteria_Firmicutes_Clostridia_Clostridiales_Peptostreptococcaceae_Romboutsia	N	Dry	-1.84504	0.351904	126	45	6.72919e-07	0.000177556
Bacteria_Firmicutes_Clostridia_Clostridiales_Ruminococcaceae_Subdoligranulum	N	Dry	1.64123	0.319799	126	81	1.09602e-06	0.000177556
Bacteria_Firmicutes_Negativicutes_Selenomonadales_Veillonellaceae_Megasphaera	Y	Dry	2.48685	0.52236	126	76	5.35706e-06	0.000578563
Bacteria_Firmicutes_Clostridia_Clostridiales_Ruminococcaceae_Faecalibacterium	Y	Wet	1.10155	0.246377	126	104	1.75641e-05	0.00142269
Bacteria_Firmicutes_Clostridia_Clostridiales_Lachnospiraceae_Roseburia	N	Dry	-1.39621	0.319817	126	84	2.67271e-05	0.00173191
Bacteria_Firmicutes_Erysipelotrichia_Erysipelotrichales_Erysipelotrichaceae_Faecalitalea	N	Dry	-1.25076	0.297163	126	80	4.9297e-05	0.00235708
Bacteria_Firmicutes_Erysipelotrichia_Erysipelotrichales_Erysipelotrichaceae_Holdemania	N	Dry	-0.673464	0.160326	126	33	5.09245e-05	0.00235708
Bacteria_Fusobacteria_Fusobacteriia_Fusobacteriales_Fusobacteriaceae_Fusobacterium	Y	Dry	-1.3495	0.326462	126	118	6.58188e-05	0.00266566
Bacteria_Actinobacteria_Actinobacteria_Bifidobacteriales_Bifidobacteriaceae_Bifidobacterium	N	Dry	1.76452	0.44217	126	80	0.000112928	0.00306602
Bacteria_Firmicutes_Clostridia_Clostridiales_Lachnospiraceae_.Ruminococcus..torques.group	Y	Dry	-0.724717	0.181174	126	125	0.000108984	0.00306602
Bacteria_Firmicutes_Clostridia_Clostridiales_Peptostreptococcaceae_Paeniclostridium	N	Dry	-1.14004	0.285789	126	32	0.000113556	0.00306602
Bacteria_Firmicutes_Negativicutes_Selenomonadales_Veillonellaceae_Allisonella	N	Dry	1.05539	0.263005	126	66	0.000103938	0.00306602
Bacteria_Firmicutes_Erysipelotrichia_Erysipelotrichales_Erysipelotrichaceae_Allobaculum	N	Dry	-1.11945	0.29091	126	23	0.000190828	0.00475603
Bacteria_Firmicutes_Clostridia_Clostridiales_Lachnospiraceae_Lachnospiraceae.uncultured	Y	Wet	0.586651	0.16237	126	122	0.000440626	0.00951752
Bacteria_Firmicutes_Clostridia_Clostridiales_Lachnospiraceae_Tyzzerella	N	Wet	0.871461	0.240357	126	62	0.0004216	0.00951752
Bacteria_Firmicutes_Clostridia_Clostridiales_Lachnospiraceae_.Eubacterium..hallii.group	N	Wet	0.769836	0.217394	126	87	0.000564895	0.0109927
Bacteria_Firmicutes_Clostridia_Clostridiales_Lachnospiraceae_.Ruminococcus..torques.group	Y	Wet	0.525489	0.148647	126	125	0.000576779	0.0109927
Bacteria_Bacteroidetes_Bacteroidia_Bacteroidales_Prevotellaceae_Prevotella.9	Y	Dry	1.6747	0.483146	126	116	0.000729352	0.0122718
Bacteria_Firmicutes_Clostridia_Clostridiales_Ruminococcaceae_Ruminococcaceae.UCG.005	N	Dry	-1.06707	0.307731	126	44	0.00072617	0.0122718
Bacteria_Firmicutes_Negativicutes_Selenomonadales_Veillonellaceae_Megamonas	Y	Dry	1.57627	0.456225	126	107	0.00075752	0.0122718
Bacteria_Firmicutes_Clostridia_Clostridiales_Lachnospiraceae_Tyzzerella	N	Dry	-0.96071	0.292951	126	62	0.00135588	0.0199684
Bacteria_Firmicutes_Erysipelotrichia_Erysipelotrichales_Erysipelotrichaceae_Faecalitalea	N	Raw	0.989759	0.300557	126	80	0.00129683	0.0199684
Bacteria_Firmicutes_Clostridia_Clostridiales_Lachnospiraceae_Lachnospiraceae.UCG.009	Y	Wet	0.628629	0.194311	126	105	0.0015648	0.0220433
Bacteria_Proteobacteria_Gammaproteobacteria_Aeromonadales_Succinivibrionaceae_Succinivibrio	N	Dry	1.19871	0.376961	126	52	0.00186763	0.025213
Bacteria_Firmicutes_Clostridia_Clostridiales_Ruminococcaceae_Ruminiclostridium.9	Y	Wet	0.582487	0.185324	126	118	0.00209914	0.0272049
Bacteria_Firmicutes_Clostridia_Clostridiales_Ruminococcaceae_Negativibacillus	Y	Wet	0.555235	0.179153	126	122	0.00240927	0.0289112
Bacteria_Firmicutes_Clostridia_Clostridiales_Ruminococcaceae_Ruminococcaceae.uncultured	Y	Wet	0.676608	0.218041	126	101	0.00238001	0.0289112
Bacteria_Actinobacteria_Coriobacteriia_Coriobacteriales_Atopobiaceae_Olsenella	N	Dry	1.02737	0.339607	126	48	0.00303077	0.0350703
Bacteria_Firmicutes_Clostridia_Clostridiales_Ruminococcaceae_Faecalibacterium	Y	Raw	-0.909068	0.303718	126	104	0.00334319	0.0373515
Bacteria_Firmicutes_Clostridia_Clostridiales_Lachnospiraceae_Tyzzerella.4	N	Dry	-0.831937	0.279347	126	34	0.00349917	0.037791
Bacteria_Firmicutes_Clostridia_Clostridiales_Lachnospiraceae_GCA.900066575	N	Wet	0.412922	0.140346	126	50	0.00390174	0.0400778
Bacteria_Firmicutes_Clostridia_Clostridiales_Ruminococcaceae_Ruminococcaceae.UCG.004	N	Wet	0.737866	0.251469	126	76	0.00399601	0.0400778
Bacteria_Firmicutes_Erysipelotrichia_Erysipelotrichales_Erysipelotrichaceae_Holdemanella	Y	Dry	1.14468	0.391057	126	87	0.00408199	0.0400778
Bacteria_Bacteroidetes_Bacteroidia_Bacteroidales_Rikenellaceae_Alistipes	N	Dry	-0.979403	0.337782	126	68	0.00443366	0.0410431
Bacteria_Firmicutes_Clostridia_Clostridiales_Ruminococcaceae_Phocea	N	Wet	0.413484	0.142308	126	48	0.00435437	0.0410431
Bacteria_Firmicutes_Clostridia_Clostridiales_Lachnospiraceae_Blautia	Y	Wet	0.297376	0.104467	126	126	0.00518586	0.0466727
Bacteria_Firmicutes_Clostridia_Clostridiales_Ruminococcaceae_Subdoligranulum	N	Wet	-0.739015	0.262385	126	81	0.00566356	0.0495944
Bacteria_Actinobacteria_Coriobacteriia_Coriobacteriales_Atopobiaceae_Libanicoccus	N	Dry	0.806936	0.290568	126	70	0.00635098	0.0541504
Bacteria_Firmicutes_Clostridia_Clostridiales_Ruminococcaceae_Intestinimonas	N	Wet	0.574866	0.209824	126	57	0.00707146	0.0587476
Bacteria_Firmicutes_Clostridia_Clostridiales_Peptostreptococcaceae_Peptostreptococcaceae.UC	N	Wet	0.778341	0.289152	126	73	0.00810481	0.0622304
Bacteria_Firmicutes_Clostridia_Clostridiales_Ruminococcaceae_Ruminiclostridium.9	Y	Raw	-0.614442	0.228455	126	118	0.00815668	0.0622304
Bacteria_Fusobacteria_Fusobacteriia_Fusobacteriales_Fusobacteriaceae_Fusobacterium	Y	Wet	0.719217	0.267851	126	118	0.00825897	0.0622304
Bacteria_Proteobacteria_Deltaproteobacteria_Desulfovibrionales_Desulfovibrionaceae_Desulfovibrio	N	Dry	-0.969149	0.357708	126	54	0.00771221	0.0622304
Bacteria_Firmicutes_Clostridia_Clostridiales_Family.XIII_Family.XIII.AD3011.group	N	Dry	-0.392611	0.148795	126	17	0.00941001	0.0677521
Bacteria_Firmicutes_Clostridia_Clostridiales_Family.XIII_.Eubacterium..brachy.group	N	Raw	0.778453	0.294967	126	32	0.00939665	0.0677521
Bacteria_Firmicutes_Erysipelotrichia_Erysipelotrichales_Erysipelotrichaceae_Holdemania	N	Wet	0.340213	0.131542	126	33	0.0108746	0.0765949
Bacteria_Firmicutes_Clostridia_Clostridiales_Lachnospiraceae_Lachnospiraceae.uncultured	Y	Dry	-0.507527	0.1979	126	122	0.011543	0.0795727
Bacteria_Bacteroidetes_Bacteroidia_Bacteroidales_Bacteroidaceae_Bacteroides	Y	Dry	-0.437926	0.171438	126	126	0.0118665	0.0800991
Bacteria_Firmicutes_Clostridia_Clostridiales_Clostridiaceae.1_Clostridium.sensu.stricto.1	Y	Raw	0.796192	0.314174	126	118	0.0125353	0.0828868
Bacteria_Firmicutes_Clostridia_Clostridiales_Lachnospiraceae_Blautia	Y	Raw	0.323755	0.128781	126	126	0.0132393	0.0857907
Bacteria_Firmicutes_Clostridia_Clostridiales_Lachnospiraceae_Lachnoclostridium	Y	Dry	-0.395735	0.158894	126	124	0.0140986	0.0895676
Bacteria_Firmicutes_Clostridia_Clostridiales_Ruminococcaceae_Butyricicoccus	Y	Wet	0.403088	0.163325	126	116	0.0149724	0.0932894
Bacteria_Firmicutes_Clostridia_Clostridiales_Lachnospiraceae_GCA.900066575	N	Dry	-0.416836	0.171057	126	50	0.0162602	0.0971332
Bacteria_Firmicutes_Clostridia_Clostridiales_Lachnospiraceae_Lachnospira	N	Wet	0.6661	0.273943	126	54	0.0164887	0.0971332
Bacteria_Firmicutes_Clostridia_Clostridiales_Lachnospiraceae_Tyzzerella	N	Raw	-0.722665	0.296297	126	62	0.0161677	0.0971332
Bacteria_Firmicutes_Negativicutes_Selenomonadales_Veillonellaceae_Allisonella	N	Wet	-0.520745	0.215787	126	66	0.0172987	0.100086
Bacteria_Firmicutes_Clostridia_Clostridiales_Ruminococcaceae_Negativibacillus	Y	Dry	-0.525229	0.218355	126	122	0.017657	0.100366
Bacteria_Firmicutes_Clostridia_Clostridiales_Ruminococcaceae_Intestinimonas	N	Dry	-0.611099	0.255738	126	57	0.0184002	0.101045
Bacteria_Firmicutes_Clostridia_Clostridiales_Ruminococcaceae_Ruminococcaceae.UCG.014	Y	Wet	0.711104	0.297054	126	107	0.0181957	0.101045
Bacteria_Firmicutes_Clostridia_Clostridiales_Lachnospiraceae_CHKCI001	N	Wet	0.523111	0.220177	126	74	0.0190651	0.101748
Bacteria_Firmicutes_Clostridia_Clostridiales_Ruminococcaceae_Ruminococcaceae.UCG.005	N	Wet	0.599398	0.252483	126	44	0.0191563	0.101748
Bacteria_Firmicutes_Clostridia_Clostridiales_Ruminococcaceae_Subdoligranulum	N	Raw	-0.754985	0.323451	126	81	0.0212228	0.110906
Bacteria_Actinobacteria_Actinobacteria_Bifidobacteriales_Bifidobacteriaceae_Bifidobacterium	N	Wet	-0.835657	0.362786	126	80	0.0229465	0.114331
Bacteria_Firmicutes_Clostridia_Clostridiales_Lachnospiraceae_Lachnospiraceae.UC	Y	Raw	0.427428	0.185674	126	121	0.0230284	0.114331
Bacteria_Firmicutes_Clostridia_Clostridiales_Ruminococcaceae_Ruminococcaceae.UCG.009	N	Raw	-0.568164	0.246542	126	27	0.0228835	0.114331
Bacteria_Proteobacteria_Gammaproteobacteria_Aeromonadales_Succinivibrionaceae_Succinivibrio	N	Wet	-0.710603	0.309284	126	52	0.0232896	0.114331
Bacteria_Proteobacteria_Gammaproteobacteria_Enterobacteriales_Enterobacteriaceae_Escherichia.Shigella	N	Dry	-0.838829	0.368539	126	76	0.0245842	0.118885
Bacteria_Firmicutes_Clostridia_Clostridiales_Family.XIII_.Eubacterium..nodatum.group	N	Wet	0.591679	0.261321	126	74	0.0253286	0.120683
Bacteria_Firmicutes_Erysipelotrichia_Erysipelotrichales_Erysipelotrichaceae_Turicibacter	N	Raw	-0.734958	0.326142	126	44	0.0260139	0.122152
Bacteria_Firmicutes_Negativicutes_Selenomonadales_Veillonellaceae_Dialister	N	Dry	1.17658	0.531336	126	48	0.0286597	0.132653
Bacteria_Actinobacteria_Coriobacteriia_Coriobacteriales_Eggerthellaceae_Slackia	Y	Raw	0.582085	0.267667	126	100	0.0315851	0.138039
Bacteria_Firmicutes_Bacilli_Lactobacillales_Streptococcaceae_Streptococcus	N	Raw	0.669667	0.309758	126	47	0.0325781	0.138039
Bacteria_Firmicutes_Clostridia_Clostridiales_Clostridiaceae.1_Clostridium.sensu.stricto.1	Y	Dry	-0.674772	0.310627	126	118	0.0317675	0.138039
Bacteria_Firmicutes_Clostridia_Clostridiales_Lachnospiraceae_.Ruminococcus..gauvreauii.group	Y	Wet	0.329338	0.152918	126	122	0.0332317	0.138039
Bacteria_Firmicutes_Clostridia_Clostridiales_Lachnospiraceae_.Ruminococcus..gnavus.group	Y	Raw	0.455539	0.210371	126	124	0.0323028	0.138039
Bacteria_Firmicutes_Clostridia_Clostridiales_Peptostreptococcaceae_Peptostreptococcus	N	Dry	-0.645335	0.294426	126	50	0.0302897	0.138039
Bacteria_Firmicutes_Clostridia_Clostridiales_Ruminococcaceae_Butyricicoccus	Y	Dry	-0.429618	0.199063	126	116	0.0328712	0.138039
Bacteria_Firmicutes_Clostridia_Clostridiales_Ruminococcaceae_Phocea	N	Dry	-0.376616	0.173447	126	48	0.0318397	0.138039
Bacteria_Actinobacteria_Coriobacteriia_Coriobacteriales_Eggerthellaceae_Eggerthellaceae.uncultured	N	Wet	0.359728	0.168781	126	33	0.0350685	0.139498
Bacteria_Firmicutes_Clostridia_Clostridiales_Peptostreptococcaceae_Paeniclostridium	N	Raw	0.615824	0.289053	126	32	0.0351389	0.139498
Bacteria_Firmicutes_Erysipelotrichia_Erysipelotrichales_Erysipelotrichaceae_Catenibacterium	Y	Raw	-1.14802	0.539349	126	71	0.035305	0.139498
Bacteria_Proteobacteria_Gammaproteobacteria_Betaproteobacteriales_Burkholderiaceae_Parasutterella	N	Dry	-0.735612	0.343853	126	38	0.0344021	0.139498
Bacteria_Proteobacteria_Deltaproteobacteria_Desulfovibrionales_Desulfovibrionaceae_Desulfovibrio	N	Raw	-0.766134	0.361793	126	54	0.0362386	0.141461
Bacteria_Actinobacteria_Coriobacteriia_Coriobacteriales_Coriobacteriaceae_Collinsella	Y	Raw	0.331116	0.157027	126	126	0.0370195	0.14279
Bacteria_Firmicutes_Clostridia_Clostridiales_Peptostreptococcaceae_Peptoclostridium	Y	Wet	0.552185	0.265933	126	115	0.0399559	0.152303
Bacteria_Firmicutes_Clostridia_Clostridiales_Lachnospiraceae_Lachnospiraceae.uncultured	Y	Raw	0.411348	0.20016	126	122	0.0420044	0.1575
Bacteria_Firmicutes_Erysipelotrichia_Erysipelotrichales_Erysipelotrichaceae_Catenibacterium	Y	Dry	1.09434	0.533259	126	71	0.0422917	0.1575
Bacteria_Actinobacteria_Actinobacteria_Bifidobacteriales_Bifidobacteriaceae_Bifidobacterium	N	Raw	-0.90555	0.44722	126	80	0.0450665	0.162699
Bacteria_Firmicutes_Clostridia_Clostridiales_Lachnospiraceae_Lachnospiraceae.NK4A136.group	Y	Wet	0.365129	0.180242	126	114	0.0449698	0.162699
Bacteria_Firmicutes_Clostridia_Clostridiales_Ruminococcaceae_Phocea	N	Raw	-0.355	0.175428	126	48	0.0451941	0.162699
Bacteria_Firmicutes_Clostridia_Clostridiales_Lachnospiraceae_Marvinbryantia	N	Dry	-0.333198	0.16565	126	25	0.0464806	0.165491
Bacteria_Actinobacteria_Coriobacteriia_Coriobacteriales_Atopobiaceae_Libanicoccus	N	Raw	-0.575412	0.293886	126	70	0.0525194	0.18496
Bacteria_Firmicutes_Clostridia_Clostridiales_Family.XIII_.Eubacterium..brachy.group	N	Wet	0.458813	0.239278	126	32	0.0575134	0.200369
Bacteria_Firmicutes_Clostridia_Clostridiales_Ruminococcaceae_Butyricicoccus	Y	Raw	0.385071	0.201337	126	116	0.0581465	0.20042
Bacteria_Actinobacteria_Coriobacteriia_Coriobacteriales_Atopobiaceae_Atopobiaceae.uncultured	N	Dry	0.230257	0.121605	126	20	0.0606614	0.200554
Bacteria_Firmicutes_Clostridia_Clostridiales_Family.XIII_.Eubacterium..nodatum.group	N	Dry	-0.603519	0.318503	126	74	0.0604777	0.200554
Bacteria_Firmicutes_Clostridia_Clostridiales_Peptostreptococcaceae_Peptostreptococcus	N	Wet	0.458769	0.241567	126	50	0.0599078	0.200554
Bacteria_Proteobacteria_Gammaproteobacteria_Betaproteobacteriales_Burkholderiaceae_Parasutterella	N	Wet	0.537626	0.28212	126	38	0.0590471	0.200554
Bacteria_Firmicutes_Clostridia_Clostridiales_Lachnospiraceae_CHKCI001	N	Raw	-0.506201	0.271421	126	74	0.0645834	0.20834
Bacteria_Firmicutes_Clostridia_Clostridiales_Ruminococcaceae_Caproiciproducens	N	Dry	-0.308795	0.165801	126	26	0.0649455	0.20834
Bacteria_Firmicutes_Negativicutes_Selenomonadales_Acidaminococcaceae_Acidaminococcus	N	Wet	-0.509446	0.273167	126	24	0.0645892	0.20834
Bacteria_Firmicutes_Clostridia_Clostridiales_Peptostreptococcaceae_Peptostreptococcaceae.UC	N	Dry	-0.63343	0.352423	126	73	0.074753	0.235382
Bacteria_Firmicutes_Erysipelotrichia_Erysipelotrichales_Erysipelotrichaceae_Turicibacter	N	Wet	0.475396	0.264567	126	44	0.0748282	0.235382

## Sheet: Table S9
Table S9. Bacterial genera that differentiate cats that eat dry food from cats that do not eat dry food, according to a Random Forest classifier.
The q2-sample-classifier plugin from the QIIME 2 “sample-classifier-ncv” pipeline was used to train the Random Forest classifier.
The model compared the fecal microbiome compositions of cats that ate dry food vs. those that did not eat any dry food.
Figure S4 in the supplementary material shows a heatmap of the relative frequencies of the bacterial genera in cats from the two groups.
Bacterial genera	importance	cumulative importance	part of core microbiome?	also detected by MaAsLin2?
Bacteria_Actinobacteria_Actinobacteria_Bifidobacteriales_Bifidobacteriaceae_Bifidobacterium	0.0399502	0.0399502		Yes
Bacteria_Actinobacteria_Coriobacteriia_Coriobacteriales_Atopobiaceae_Libanicoccus	0.0328386	0.0727888
Bacteria_Firmicutes_Clostridia_Clostridiales_Peptostreptococcaceae_Paeniclostridium	0.0303554	0.103144		Yes
Bacteria_Fusobacteria_Fusobacteriia_Fusobacteriales_Fusobacteriaceae_Fusobacterium	0.0299554	0.1331	Yes	Yes
Bacteria_Firmicutes_Clostridia_Clostridiales_Ruminococcaceae_Subdoligranulum	0.0282546	0.161354		Yes
Bacteria_Firmicutes_Negativicutes_Selenomonadales_Veillonellaceae_Megasphaera	0.0275008	0.188855	Yes	Yes
Bacteria_Firmicutes_Clostridia_Clostridiales_Lachnospiraceae_Roseburia	0.0269907	0.215846		Yes
Bacteria_Firmicutes_Clostridia_Clostridiales_Peptostreptococcaceae_Romboutsia	0.0268584	0.242704		Yes
Bacteria_Bacteroidetes_Bacteroidia_Bacteroidales_Prevotellaceae_Prevotella 9	0.0264315	0.269136	Yes	Yes
Bacteria_Proteobacteria_Gammaproteobacteria_Betaproteobacteriales_Burkholderiaceae_Sutterella	0.0232419	0.292378	Yes
Bacteria_Firmicutes_Erysipelotrichia_Erysipelotrichales_Erysipelotrichaceae_Faecalitalea	0.0199305	0.312308	Yes	Yes
Bacteria_Proteobacteria_Gammaproteobacteria_Enterobacteriales_Enterobacteriaceae_Escherichia-Shigella	0.0190863	0.331394
Bacteria_Firmicutes_Clostridia_Clostridiales_Lachnospiraceae_CHKCI001	0.0187863	0.350181
Bacteria_Actinobacteria_Coriobacteriia_Coriobacteriales_Coriobacteriaceae_Collinsella	0.0177871	0.367968	Yes
Bacteria_Bacteroidetes_Bacteroidia_Bacteroidales_Rikenellaceae_Alistipes	0.0174857	0.385454		Yes
Bacteria_Firmicutes_Clostridia_Clostridiales_Lachnospiraceae_[Ruminococcus] torques group	0.0169431	0.402397	Yes	Yes
Bacteria_Firmicutes_Clostridia_Clostridiales_Lachnospiraceae_[Eubacterium] hallii group	0.0158183	0.418215
Bacteria_Actinobacteria_Actinobacteria_Actinomycetales_Actinomycetaceae_Actinomyces	0.0156281	0.433843
Bacteria_Bacteroidetes_Bacteroidia_Bacteroidales_Tannerellaceae_Parabacteroides	0.013108	0.446951	Yes
Bacteria_Firmicutes_Negativicutes_Selenomonadales_Veillonellaceae_Allisonella	0.0128127	0.459764		Yes
Bacteria_Firmicutes_Bacilli_Lactobacillales_Enterococcaceae_Enterococcus	0.0127802	0.472544
Bacteria_Firmicutes_Clostridia_Clostridiales_Ruminococcaceae_[Eubacterium] coprostanoligenes group	0.0127488	0.485293
Bacteria_Firmicutes_Clostridia_Clostridiales_Ruminococcaceae_Butyricicoccus	0.0124651	0.497758	Yes
Bacteria_Epsilonbacteraeota_Campylobacteria_Campylobacterales_Helicobacteraceae_Helicobacter	0.0123866	0.510144
Bacteria_Firmicutes_Clostridia_Clostridiales_Eubacteriaceae_Anaerofustis	0.0123674	0.522512
Bacteria_Firmicutes_Negativicutes_Selenomonadales_Veillonellaceae_Dialister	0.0122744	0.534786
Bacteria_Firmicutes_Clostridia_Clostridiales_Clostridiaceae 1_Clostridium sensu stricto 1	0.0107777	0.545564
Bacteria_Firmicutes_Clostridia_Clostridiales_Lachnospiraceae_Lachnospiraceae UC	0.0102283	0.555792
Bacteria_Firmicutes_Erysipelotrichia_Erysipelotrichales_Erysipelotrichaceae_Holdemanella	0.0102176	0.56601		Yes
Bacteria_Proteobacteria_Gammaproteobacteria_Aeromonadales_Succinivibrionaceae_Succinivibrio	0.0101179	0.576128		Yes
Bacteria_Firmicutes_Clostridia_Clostridiales_Lachnospiraceae_Lachnoclostridium	0.00979781	0.585925
Bacteria_Firmicutes_Clostridia_Clostridiales_Ruminococcaceae_Negativibacillus	0.00962302	0.595548
Bacteria_Firmicutes_Clostridia_Clostridiales_Ruminococcaceae_Fournierella	0.00960175	0.60515
Bacteria_Firmicutes_Negativicutes_Selenomonadales_Veillonellaceae_Megamonas	0.0094387	0.614589		Yes
Bacteria_Firmicutes_Clostridia_Clostridiales_Lachnospiraceae_[Ruminococcus] gauvreauii group	0.0091263	0.623715
Bacteria_Bacteroidetes_Bacteroidia_Bacteroidales_Bacteroidaceae_Bacteroides	0.00902341	0.632739
Bacteria_Firmicutes_Clostridia_Clostridiales_Lachnospiraceae_Lachnospiraceae NK4A136 group	0.00883755	0.641576
Bacteria_Firmicutes_Clostridia_Clostridiales_Ruminococcaceae_Faecalibacterium	0.00871286	0.650289
Bacteria_Proteobacteria_Deltaproteobacteria_Desulfovibrionales_Desulfovibrionaceae_Desulfovibrio	0.0086986	0.658988
Bacteria_Firmicutes_Clostridia_Clostridiales_Lachnospiraceae_Tyzzerella	0.00841442	0.667402		Yes
Bacteria_Actinobacteria_Coriobacteriia_Coriobacteriales_Eggerthellaceae_Slackia	0.00835962	0.675762
Bacteria_Firmicutes_Clostridia_Clostridiales_Peptostreptococcaceae_Peptoclostridium	0.00822113	0.683983
Bacteria_Firmicutes_Clostridia_Clostridiales_Lachnospiraceae_[Ruminococcus] gnavus group	0.00807436	0.692057
Bacteria_Firmicutes_Erysipelotrichia_Erysipelotrichales_Erysipelotrichaceae_Erysipelatoclostridium	0.00791341	0.699971
Bacteria_Firmicutes_Clostridia_Clostridiales_Ruminococcaceae_Flavonifractor	0.00761249	0.707583
Bacteria_Firmicutes_Clostridia_Clostridiales_Lachnospiraceae_Blautia	0.00740149	0.714985
Bacteria_Actinobacteria_Coriobacteriia_Coriobacteriales_Atopobiaceae_Olsenella	0.00726173	0.722246		Yes
Bacteria_Firmicutes_Clostridia_Clostridiales_Ruminococcaceae_Oscillibacter	0.0070565	0.729303
Bacteria_Firmicutes_Erysipelotrichia_Erysipelotrichales_Erysipelotrichaceae_Allobaculum	0.00691016	0.736213		Yes
Bacteria_Bacteroidetes_Bacteroidia_Bacteroidales_Prevotellaceae_Alloprevotella	0.00682859	0.743042
Bacteria_Firmicutes_Clostridia_Clostridiales_Peptostreptococcaceae_Peptostreptococcus	0.00680698	0.749849
Bacteria_Firmicutes_Clostridia_Clostridiales_Ruminococcaceae_Ruminococcaceae UCG-014	0.0067627	0.756611
Bacteria_Firmicutes_Clostridia_Clostridiales_Lachnospiraceae_Lachnospiraceae uncultured	0.00658262	0.763194
Bacteria_Firmicutes_Clostridia_Clostridiales_Ruminococcaceae_Ruminococcaceae UCG-005	0.00625808	0.769452		Yes
Bacteria_Firmicutes_Bacilli_Lactobacillales_Streptococcaceae_Streptococcus	0.0061989	0.775651
Bacteria_Firmicutes_Negativicutes_Selenomonadales_Veillonellaceae_Veillonella	0.00619845	0.781849
Bacteria_Firmicutes_Clostridia_Clostridiales_Lachnospiraceae_Lachnospiraceae UCG-009	0.00608786	0.787937
Bacteria_Firmicutes_Clostridia_Clostridiales_Peptostreptococcaceae_Peptostreptococcaceae UC	0.0058537	0.793791
Bacteria_Firmicutes_Clostridia_Clostridiales_Lachnospiraceae_Sellimonas	0.0056789	0.79947
Bacteria_Firmicutes_Clostridia_Clostridiales_Ruminococcaceae_Ruminococcaceae uncultured	0.00545166	0.804921
Bacteria_Bacteroidetes_Bacteroidia_Bacteroidales_Marinifilaceae_Odoribacter	0.00538312	0.810305
Bacteria_Firmicutes_Clostridia_Clostridiales_Family XIII_[Eubacterium] nodatum group	0.00517166	0.815476
Bacteria_Firmicutes_Clostridia_Clostridiales_Lachnospiraceae_Lachnospira	0.00514465	0.820621
Bacteria_Firmicutes_Erysipelotrichia_Erysipelotrichales_Erysipelotrichaceae_Catenibacterium	0.00513125	0.825752
Bacteria_Firmicutes_Clostridia_Clostridiales_Family XIII_Family XIII UCG-001	0.00510761	0.83086
Bacteria_Actinobacteria_Coriobacteriia_Coriobacteriales_uncultured_Coriobacteriales uncultured bacterium	0.00502306	0.835883
Bacteria_Firmicutes_Clostridia_Clostridiales_Ruminococcaceae_Ruminococcaceae UCG-004	0.00496154	0.840844
Bacteria_Firmicutes_Negativicutes_Selenomonadales_Acidaminococcaceae_Phascolarctobacterium	0.00481489	0.845659
Bacteria_Firmicutes_Clostridia_Clostridiales_Peptococcaceae_Peptococcus	0.00474711	0.850406
Bacteria_Firmicutes_Clostridia_Clostridiales_Ruminococcaceae_Ruminiclostridium 9	0.0047213	0.855128
Bacteria_Bacteroidetes_Bacteroidia_Bacteroidales_Barnesiellaceae_Barnesiella	0.00467907	0.859807
Bacteria_Actinobacteria_Coriobacteriia_Coriobacteriales_Eggerthellaceae_Parvibacter	0.00451918	0.864326
Bacteria_Proteobacteria_Gammaproteobacteria_Betaproteobacteriales_Burkholderiaceae_Parasutterella	0.00441124	0.868737
Bacteria_Firmicutes_Clostridia_Clostridiales_Ruminococcaceae_Ruminococcaceae UC	0.00407215	0.872809
Bacteria_Firmicutes_Clostridia_Clostridiales_Ruminococcaceae_Ruminiclostridium 5	0.00396031	0.87677
Bacteria_Firmicutes_Clostridia_Clostridiales_Lachnospiraceae_GCA-900066575	0.00386903	0.880639
Bacteria_Firmicutes_Clostridia_Clostridiales_Ruminococcaceae_UBA1819	0.00370247	0.884341
Bacteria_Firmicutes_Clostridia_Clostridiales_Lachnospiraceae_Lachnospiraceae uncultured organism	0.00362644	0.887967
Bacteria_Proteobacteria_Alphaproteobacteria_Rhodospirillales_uncultured_uncultured gut metagenome	0.00361393	0.891581
Bacteria_Firmicutes_Clostridia_Clostridiales_Family XIII_[Eubacterium] brachy group	0.00344032	0.895022
Bacteria_Actinobacteria_Coriobacteriia_Coriobacteriales_Atopobiaceae_Atopobiaceae uncultured	0.00327712	0.898299
Bacteria_Proteobacteria_Gammaproteobacteria_Enterobacteriales_Enterobacteriaceae_Proteus	0.00308621	0.901385
Bacteria_Firmicutes_Clostridia_Clostridiales_Lachnospiraceae_Anaerostipes	0.0030722	0.904457
Bacteria_Proteobacteria_Deltaproteobacteria_Desulfovibrionales_Desulfovibrionaceae_Desulfovibrionaceae uncultured	0.00256589	0.907023
Bacteria_Firmicutes_Erysipelotrichia_Erysipelotrichales_Erysipelotrichaceae_Faecalicoccus	0.00252917	0.909552
Bacteria_Firmicutes_Clostridia_Clostridiales_Lachnospiraceae_Marvinbryantia	0.00252288	0.912075
Bacteria_Epsilonbacteraeota_Campylobacteria_Campylobacterales_Campylobacteraceae_Campylobacter	0.00251847	0.914594
Bacteria_Firmicutes_Clostridia_Clostridiales_Ruminococcaceae_Caproiciproducens	0.00249166	0.917085
Bacteria_Firmicutes_Erysipelotrichia_Erysipelotrichales_Erysipelotrichaceae_Holdemania	0.00244873	0.919534		Yes
Bacteria_Firmicutes_Clostridia_Clostridiales_Family XIII_Mogibacterium	0.00244417	0.921978
Bacteria_Firmicutes_Clostridia_Clostridiales_Lachnospiraceae_Tyzzerella 4	0.00237499	0.924353		Yes
Bacteria_Proteobacteria_Gammaproteobacteria_Aeromonadales_Succinivibrionaceae_Anaerobiospirillum	0.00235087	0.926704
Bacteria_Firmicutes_Bacilli_Lactobacillales_Lactobacillaceae_Lactobacillus	0.00234741	0.929051
Bacteria_Bacteroidetes_Bacteroidia_Bacteroidales_Muribaculaceae_Muribaculaceae gut metagenome	0.00222912	0.931281
Bacteria_Actinobacteria_Coriobacteriia_Coriobacteriales_Eggerthellaceae_Eggerthella	0.00215265	0.933433
Bacteria_Firmicutes_Clostridia_Clostridiales_Ruminococcaceae_Intestinimonas	0.00211871	0.935552
Bacteria_Proteobacteria_Deltaproteobacteria_Desulfovibrionales_Desulfovibrionaceae_Bilophila	0.00199451	0.937546
Bacteria_Firmicutes_Clostridia_Clostridiales_Ruminococcaceae_Phocea	0.00196471	0.939511
Bacteria_Bacteroidetes_Bacteroidia_Bacteroidales_Barnesiellaceae_Barnesiellaceae uncultured	0.00195481	0.941466
Bacteria_Firmicutes_Erysipelotrichia_Erysipelotrichales_Erysipelotrichaceae_Solobacterium	0.00195301	0.943419
Bacteria_Proteobacteria_Gammaproteobacteria_Aeromonadales_Succinivibrionaceae_Succinatimonas	0.00185001	0.945269
Bacteria_Firmicutes_Clostridia_Clostridiales_Ruminococcaceae_GCA-900066225	0.00184542	0.947114
Bacteria_Firmicutes_Negativicutes_Selenomonadales_Acidaminococcaceae_Acidaminococcus	0.00167218	0.948787
Bacteria_Firmicutes_Clostridia_Clostridiales_Ruminococcaceae_Ruminococcaceae UCG-009	0.00164467	0.950431
Bacteria_Proteobacteria_Alphaproteobacteria_Rhodospirillales_uncultured_uncultured uncultured organism	0.0016179	0.952049
Bacteria_Firmicutes_Erysipelotrichia_Erysipelotrichales_Erysipelotrichaceae_Erysipelotrichaceae UCG-003	0.00147278	0.953522
Bacteria_Firmicutes_Clostridia_Clostridiales_Peptostreptococcaceae_Terrisporobacter	0.00146678	0.954989
Bacteria_Firmicutes_Erysipelotrichia_Erysipelotrichales_Erysipelotrichaceae_Turicibacter	0.00143911	0.956428
Bacteria_Bacteroidetes_Bacteroidia_Sphingobacteriales_Sphingobacteriaceae_Sphingobacterium	0.0014349	0.957863
Bacteria_Proteobacteria_Gammaproteobacteria_Pasteurellales_Pasteurellaceae_Pasteurella	0.00137733	0.95924
Bacteria_Proteobacteria_Alphaproteobacteria_Rhodospirillales_uncultured_Azospirillum sp. 47_25	0.00135264	0.960593
Bacteria_Firmicutes_Bacilli_Bacillales_Staphylococcaceae_Staphylococcus	0.00134834	0.961941
Bacteria_Firmicutes_Clostridia_Clostridiales_Lachnospiraceae_[Eubacterium] ventriosum group	0.00134378	0.963285
Bacteria_Firmicutes_Erysipelotrichia_Erysipelotrichales_Erysipelotrichaceae_Erysipelotrichaceae UCG-010	0.00125958	0.964544
Bacteria_Actinobacteria_Coriobacteriia_Coriobacteriales_Coriobacteriales Incertae Sedis_Coriobacteriales Incertae Sedis uncultured	0.00120972	0.965754
Bacteria_Firmicutes_Bacilli_Lactobacillales_UC_Lactobacillales	0.0011536	0.966908
Bacteria_Firmicutes_Erysipelotrichia_Erysipelotrichales_Erysipelotrichaceae_Erysipelotrichaceae UC	0.00113959	0.968047
Bacteria_Firmicutes_Clostridia_Clostridiales_Ruminococcaceae_Candidatus Soleaferrea	0.00113462	0.969182
Bacteria_Firmicutes_Clostridia_Clostridiales_Lachnospiraceae_Howardella	0.0011235	0.970305
Bacteria_Actinobacteria_Coriobacteriia_Coriobacteriales_Eggerthellaceae_Senegalimassilia	0.00109526	0.971401
Bacteria_Firmicutes_Clostridia_Clostridiales_Family XIII_Family XIII AD3011 group	0.00109017	0.972491
Bacteria_Actinobacteria_Coriobacteriia_Coriobacteriales_Eggerthellaceae_CHKCI002	0.00107506	0.973566
Bacteria_Bacteroidetes_Bacteroidia_Bacteroidales_Marinifilaceae_Butyricimonas	0.00103599	0.974602
Bacteria_Firmicutes_Clostridia_Clostridiales_Ruminococcaceae_Ruminococcaceae UCG-013	0.000935469	0.975537
Bacteria_Firmicutes_Erysipelotrichia_Erysipelotrichales_Erysipelotrichaceae_Candidatus Stoquefichus	0.00093072	0.976468
Bacteria_Proteobacteria_Gammaproteobacteria_Betaproteobacteriales_Neisseriaceae_Conchiformibius	0.000827003	0.977295
Bacteria_Actinobacteria_Actinobacteria_Micrococcales_Microbacteriaceae_Leucobacter	0.000674295	0.977969
Bacteria_Bacteroidetes_Bacteroidia_Bacteroidales_Porphyromonadaceae_Porphyromonas	0.000621243	0.978591
Bacteria_Proteobacteria_Deltaproteobacteria_Desulfovibrionales_Desulfovibrionaceae_Mailhella	0.000616392	0.979207
Bacteria_Bacteroidetes_Bacteroidia_Bacteroidales_Prevotellaceae_Paraprevotella	0.000610927	0.979818
Bacteria_Firmicutes_Clostridia_Clostridiales_Ruminococcaceae_Anaerotruncus	0.000591103	0.980409
Bacteria_Firmicutes_Bacilli_Lactobacillales_Streptococcaceae_Lactococcus	0.000580952	0.98099
Bacteria_Firmicutes_Clostridia_Clostridiales_Ruminococcaceae_Oscillospira	0.000575375	0.981565
Bacteria_Firmicutes_Clostridia_Clostridiales_Lachnospiraceae_Agathobacter	0.000568722	0.982134
Bacteria_Actinobacteria_Coriobacteriia_Coriobacteriales_Eggerthellaceae_Eggerthellaceae UC	0.000561605	0.982696
Bacteria_Actinobacteria_Coriobacteriia_Coriobacteriales_Eggerthellaceae_Eggerthellaceae uncultured	0.000556277	0.983252
Bacteria_Firmicutes_Clostridia_Clostridiales_Ruminococcaceae_Acetanaerobacterium	0.000551838	0.983804
Bacteria_Firmicutes_Clostridia_Clostridiales_Lachnospiraceae_Eisenbergiella	0.000545367	0.984349
Bacteria_Firmicutes_Clostridia_Clostridiales_Ruminococcaceae_Hydrogenoanaerobacterium	0.000535026	0.984884
Bacteria_Bacteroidetes_Bacteroidia_Flavobacteriales_Flavobacteriaceae_Flavobacterium	0.000524022	0.985408
Bacteria_Firmicutes_Erysipelotrichia_Erysipelotrichales_Erysipelotrichaceae_[Clostridium] innocuum group	0.000523259	0.985932
Bacteria_Proteobacteria_Gammaproteobacteria_Pseudomonadales_Moraxellaceae_Acinetobacter	0.000518903	0.98645
Bacteria_Synergistetes_Synergistia_Synergistales_Synergistaceae_Fretibacterium	0.000516035	0.986966
Bacteria_Firmicutes_Bacilli_Bacillales_Listeriaceae_Brochothrix	0.000509069	0.987476
Bacteria_Firmicutes_Clostridia_Clostridiales_UC_Clostridiales	0.000488061	0.987964
Bacteria_Firmicutes_Clostridia_Clostridiales_Eubacteriaceae_Eubacterium	0.000462028	0.988426
Bacteria_Firmicutes_Clostridia_Clostridiales_Lachnospiraceae_Cellulosilyticum	0.000421871	0.988848
Bacteria_Proteobacteria_Gammaproteobacteria_Xanthomonadales_Xanthomonadaceae_Stenotrophomonas	0.000406963	0.989254
Bacteria_Actinobacteria_Coriobacteriia_Coriobacteriales_Atopobiaceae_Atopobium	0.000399552	0.989654
Bacteria_Firmicutes_Bacilli_Lactobacillales_Leuconostocaceae_Leuconostoc	0.000381976	0.990036
Bacteria_Firmicutes_Clostridia_Clostridiales_Clostridiaceae 1_Sarcina	0.000344695	0.990381
Bacteria_Proteobacteria_Alphaproteobacteria_Caulobacterales_Hyphomonadaceae_Hyphomonadaceae uncultured	0.00033608	0.990717
Bacteria_Proteobacteria_Deltaproteobacteria_Myxococcales_Sandaracinaceae_Sandaracinaceae UC	0.000325322	0.991042
Bacteria_Firmicutes_Negativicutes_Selenomonadales_Veillonellaceae_Mitsuokella	0.000306124	0.991348
Bacteria_Firmicutes_Clostridia_Clostridiales_Christensenellaceae_Christensenellaceae R-7 group	0.000284521	0.991633
Bacteria_Firmicutes_Clostridia_Clostridiales_Family XI_Parvimonas	0.000274009	0.991907
Bacteria_Firmicutes_Clostridia_Clostridiales_Peptostreptococcaceae_Clostridioides	0.000268152	0.992175
Bacteria_Verrucomicrobia_Verrucomicrobiae_Opitutales_Opitutaceae_Cephaloticoccus	0.000261806	0.992437
Bacteria_Actinobacteria_Coriobacteriia_Coriobacteriales_Eggerthellaceae_Adlercreutzia	0.000257468	0.992694
Bacteria_Omnitrophicaeota_Omnitrophia_Omnitrophales_Omnitrophaceae_Candidatus Omnitrophus	0.000254882	0.992949
Bacteria_Firmicutes_Clostridia_Clostridiales_Clostridiaceae 1_Candidatus Arthromitus	0.000254882	0.993204
Bacteria_Actinobacteria_Coriobacteriia_Coriobacteriales_Coriobacteriales Incertae Sedis_Raoultibacter	0.000250686	0.993455
Bacteria_Chloroflexi_Anaerolineae_SBR1031_A4b_SBR1031 uncultured bacterium	0.000247263	0.993702
Bacteria_Firmicutes_Clostridia_Clostridiales_Ruminococcaceae_Angelakisella	0.000245938	0.993948
Bacteria_Firmicutes_Clostridia_Clostridiales_Lachnospiraceae_Epulopiscium	0.000245333	0.994193
Bacteria_Firmicutes_Clostridia_Clostridiales_Ruminococcaceae_Ruminococcus 1	0.000243403	0.994437
Bacteria_Verrucomicrobia_Verrucomicrobiae_Verrucomicrobiales_Akkermansiaceae_Akkermansia	0.000238794	0.994675
Bacteria_Proteobacteria_Deltaproteobacteria_Myxococcales_BIrii41_Myxococcales uncultured bacterium	0.000238794	0.994914
Bacteria_Firmicutes_Clostridia_Clostridiales_Lachnospiraceae_Shuttleworthia	0.000236121	0.99515
Bacteria_Firmicutes_Bacilli_Bacillales_Bacillaceae_Bacillus	0.000233026	0.995383
Bacteria_Proteobacteria_Alphaproteobacteria_Rhizobiales_Rhizobiaceae_Allorhizobium-Neorhizobium-Pararhizobium-Rhizobium	0.00023062	0.995614
Bacteria_Tenericutes_Mollicutes_Mollicutes RF39_UC_Mollicutes RF39	0.000229262	0.995843
Bacteria_Actinobacteria_Coriobacteriia_Coriobacteriales_Eggerthellaceae_Gordonibacter	0.000229262	0.996072
Bacteria_Proteobacteria_Gammaproteobacteria_Thiomicrospirales_Thiomicrospiraceae_endosymbionts	0.000229262	0.996302
Bacteria_Planctomycetes_Phycisphaerae_Tepidisphaerales_WD2101 soil group_Tepidisphaerales uncultured bacterium	0.000229262	0.996531
Bacteria_Proteobacteria_Gammaproteobacteria_Enterobacteriales_Enterobacteriaceae_Hafnia-Obesumbacterium	0.000216716	0.996748
Bacteria_Firmicutes_Clostridia_Clostridiales_Lachnospiraceae_Fusicatenibacter	0.000208491	0.996956
Bacteria_Firmicutes_Bacilli_Lactobacillales_Carnobacteriaceae_Carnobacterium	0.000205622	0.997162
Bacteria_Firmicutes_Clostridia_Clostridiales_Ruminococcaceae_Pseudoflavonifractor	0.000202826	0.997365
Bacteria_Proteobacteria_Deltaproteobacteria_Desulfovibrionales_Desulfovibrionaceae_Desulfovibrionaceae UC	0.000190307	0.997555
Bacteria_Firmicutes_Clostridia_Clostridiales_Lachnospiraceae_Coprococcus 3	0.000190307	0.997745
Bacteria_Firmicutes_Bacilli_Lactobacillales_Aerococcaceae_Aerococcaceae uncultured	0.000190307	0.997936
Bacteria_Firmicutes_Clostridia_Clostridiales_Lachnospiraceae_Lachnospiraceae UCG-004	0.000190307	0.998126
Bacteria_Proteobacteria_Gammaproteobacteria_Pseudomonadales_Pseudomonadaceae_Pseudomonas	0.000190123	0.998316
Bacteria_Acidobacteria_Blastocatellia (Subgroup 4)_Blastocatellales_Blastocatellaceae_Blastocatella	0.000181224	0.998497
Bacteria_Bacteroidetes_Bacteroidia_Bacteroidales_Prevotellaceae_Prevotellaceae uncultured	0.000180079	0.998677
Bacteria_Planctomycetes_vadinHA49_UC_UC_UC	0.000168565	0.998846
Bacteria_Gemmatimonadetes_Gemmatimonadetes_Gemmatimonadales_Gemmatimonadaceae_Gemmatimonas	0.000149438	0.998995
Bacteria_BRC1_metagenome_metagenome_metagenome_metagenome	0.000145243	0.999141
Bacteria_Patescibacteria_Parcubacteria_Candidatus Azambacteria_uncultured bacterium_Candidatus Azambacteria uncultured bacterium	0.000145243	0.999286
Bacteria_Firmicutes_Erysipelotrichia_Erysipelotrichales_Erysipelotrichaceae_Erysipelotrichaceae UCG-004	0.000141819	0.999428
Bacteria_Proteobacteria_Gammaproteobacteria_Enterobacteriales_Enterobacteriaceae_Enterobacteriaceae UC	0.000141786	0.999569
Bacteria_Patescibacteria_Parcubacteria_Candidatus Nomurabacteria_uncultured bacterium_Candidatus Nomurabacteria uncultured bacterium	0.000139278	0.999709
Bacteria_Proteobacteria_Alphaproteobacteria_Caulobacterales_Hyphomonadaceae_Hyphomonas	0.000120267	0.999829
Bacteria_Firmicutes_Clostridia_Clostridiales_Eubacteriaceae_Eubacteriaceae UC	0.000105444	0.999934
Bacteria_Proteobacteria_Deltaproteobacteria_Myxococcales_Nannocystaceae_Nannocystis	6.56446e-05	1
Bacteria_Proteobacteria_Gammaproteobacteria_Betaproteobacteriales_Neisseriaceae_Neisseriaceae uncultured	0	1
Bacteria_Proteobacteria_Gammaproteobacteria_Betaproteobacteriales_Burkholderiaceae_Delftia	0	1
Bacteria_Bacteroidetes_Bacteroidia_Bacteroidales_Rikenellaceae_Rikenella	0	1
Bacteria_Proteobacteria_Gammaproteobacteria_Betaproteobacteriales_UC_Betaproteobacteriales	0
Bacteria_Proteobacteria_Gammaproteobacteria_Cardiobacteriales_Cardiobacteriaceae_Cardiobacteriaceae uncultured	0
Bacteria_Proteobacteria_Gammaproteobacteria_Betaproteobacteriales_Burkholderiaceae_Ralstonia	0
Bacteria_Bacteroidetes_Bacteroidia_Bacteroidales_Rikenellaceae_Rikenellaceae RC9 gut group	0
Bacteria_Firmicutes_Clostridia_Clostridiales_Ruminococcaceae_Ruminococcus 2	0
Bacteria_Proteobacteria_Gammaproteobacteria_Betaproteobacteriales_Burkholderiaceae_Burkholderiaceae UC	0
Bacteria_Proteobacteria_Gammaproteobacteria_Betaproteobacteriales_Burkholderiaceae_Achromobacter	0
Bacteria_Bacteroidetes_Bacteroidia_Chitinophagales_Saprospiraceae_Saprospiraceae uncultured	0
Bacteria_Bacteroidetes_Bacteroidia_Cytophagales_Spirosomaceae_Spirosomaceae UC	0
Bacteria_Proteobacteria_Deltaproteobacteria_Oligoflexales_Oligoflexaceae_Silvanigrella	0
Bacteria_Bacteroidetes_Bacteroidia_Flavobacteriales_Weeksellaceae_Bergeyella	0
Bacteria_Bacteroidetes_Bacteroidia_Sphingobacteriales_NS11-12 marine group_uncultured Cytophagales bacterium	0
Bacteria_Bacteroidetes_Bacteroidia_Sphingobacteriales_Sphingobacteriaceae_Arcticibacter	0
Bacteria_Chloroflexi_Anaerolineae_SBR1031_A4b_A4b UC	0
Bacteria_Chloroflexi_Anaerolineae_SBR1031_A4b_uncultured Antarctic bacterium LB3-100	0
Bacteria_Chloroflexi_Chloroflexia_Chloroflexales_Chloroflexaceae_Candidatus Chloroploca	0
Bacteria_Bacteroidetes_Bacteroidia_Bacteroidales_uncultured_uncultured gut metagenome	0
Bacteria_Bacteroidetes_Bacteroidia_Bacteroidales_Muribaculaceae_Bacteroidales uncultured bacterium	0
Bacteria_Bacteroidetes_Bacteroidia_Bacteroidales_Prevotellaceae_Prevotellaceae Ga6A1 group	0
Bacteria_Proteobacteria_Alphaproteobacteria_Sphingomonadales_Sphingomonadaceae_Sphingomonas	0
Bacteria_Actinobacteria_Actinobacteria_Corynebacteriales_Corynebacteriaceae_Corynebacterium	0
Bacteria_Actinobacteria_Actinobacteria_Corynebacteriales_Corynebacteriaceae_Corynebacterium 1	0
Bacteria_Verrucomicrobia_Verrucomicrobiae_Chthoniobacterales_Chthoniobacteraceae_LD29	0
Bacteria_Verrucomicrobia_Verrucomicrobiae_Chthoniobacterales_Chthoniobacteraceae_Chthoniobacter	0
Bacteria_Tenericutes_Mollicutes_Mycoplasmatales_Mycoplasmataceae_Mycoplasma	0
Bacteria_Tenericutes_Mollicutes_Mollicutes RF39_uncultured rumen bacterium_uncultured rumen bacterium	0
Bacteria_Tenericutes_Mollicutes_Mollicutes RF39_uncultured bacterium_Mollicutes RF39 uncultured bacterium	0
Bacteria_Actinobacteria_Coriobacteriia_Coriobacteriales_Atopobiaceae_Atopobiaceae UC	0
Bacteria_Actinobacteria_Coriobacteriia_Coriobacteriales_Coriobacteriaceae_Coriobacterium	0
Bacteria_Proteobacteria_UC_UC_UC_Proteobacteria	0
Bacteria_Proteobacteria_Gammaproteobacteria_Xanthomonadales_uncultured_Xanthomonadales	0
Bacteria_Proteobacteria_Gammaproteobacteria_Xanthomonadales_Xanthomonadaceae_Xanthomonas	0
Bacteria_Actinobacteria_Coriobacteriia_Coriobacteriales_Eggerthellaceae_Enterorhabdus	0
Bacteria_Proteobacteria_Gammaproteobacteria_Xanthomonadales_Xanthomonadaceae_Luteimonas	0
Bacteria_Proteobacteria_Gammaproteobacteria_Xanthomonadales_Rhodanobacteraceae_Rhodanobacteraceae uncultured	0
Bacteria_Actinobacteria_Coriobacteriia_Coriobacteriales_Eggerthellaceae_Paraeggerthella	0
Bacteria_Actinobacteria_Coriobacteriia_Coriobacteriales_UC_Coriobacteriales	0
Bacteria_Proteobacteria_Gammaproteobacteria_Pseudomonadales_Moraxellaceae_Moraxella	0
Bacteria_Proteobacteria_Gammaproteobacteria_Pasteurellales_Pasteurellaceae_Pasteurellaceae UC	0
Bacteria_Bacteroidetes_Bacteroidia_Bacteroidales_Barnesiellaceae_Coprobacter	0
Bacteria_Proteobacteria_Gammaproteobacteria_Pasteurellales_Pasteurellaceae_Gallibacterium	0
Bacteria_Proteobacteria_Gammaproteobacteria_Pasteurellales_Pasteurellaceae_Frederiksenia	0
Bacteria_Proteobacteria_Gammaproteobacteria_Gammaproteobacteria Incertae Sedis_Unknown Family_Acidibacter	0
Bacteria_Proteobacteria_Gammaproteobacteria_Enterobacteriales_Enterobacteriaceae_Providencia	0
Bacteria_Bacteroidetes_Bacteroidia_Bacteroidales_Marinifilaceae_Sanguibacteroides	0
Bacteria_Chloroflexi_Chloroflexia_Chloroflexales_Roseiflexaceae_Roseiflexaceae uncultured	0
Bacteria_Firmicutes_Bacilli_Bacillales_Family XI_Gemella	0
Bacteria_Proteobacteria_Alphaproteobacteria_Sneathiellales_Sneathiellaceae_Taonella	0
Bacteria_Firmicutes_Clostridia_Clostridiales_Defluviitaleaceae_Defluviitaleaceae UCG-011	0
Bacteria_Firmicutes_Clostridia_Clostridiales_Family XIII_Family XIII UC	0
Bacteria_Firmicutes_Clostridia_Clostridiales_Family XI_Gallicola	0
Bacteria_Firmicutes_Clostridia_Clostridiales_Family XI_Helcococcus	0
Bacteria_Firmicutes_Clostridia_Clostridiales_Heliobacteriaceae_Hydrogenispora	0
Bacteria_Firmicutes_Clostridia_Clostridiales_Lachnospiraceae_Acetitomaculum	0
Bacteria_Firmicutes_Clostridia_Clostridiales_Lachnospiraceae_Cuneatibacter	0
Bacteria_Firmicutes_Clostridia_Clostridiales_Lachnospiraceae_Dorea	0
Bacteria_Firmicutes_Clostridia_Clostridiales_Lachnospiraceae_Lachnospiraceae UCG-010	0
Bacteria_Firmicutes_Clostridia_Clostridiales_Lachnospiraceae_Lactonifactor	0
Bacteria_Firmicutes_Clostridia_Clostridiales_Lachnospiraceae_Oribacterium	0
Bacteria_Firmicutes_Clostridia_Clostridiales_Lachnospiraceae_Tyzzerella 3	0
Bacteria_Firmicutes_Erysipelotrichia_Erysipelotrichales_Erysipelotrichaceae_Faecalibaculum	0
Bacteria_Firmicutes_Erysipelotrichia_Erysipelotrichales_Erysipelotrichaceae_Erysipelotrichaceae uncultured	0
Bacteria_Firmicutes_Clostridia_Clostridiales_Lachnospiraceae_[Eubacterium] fissicatena group	0
Bacteria_Firmicutes_Clostridia_Clostridiales_Peptococcaceae_Peptococcaceae uncultured	0
Bacteria_Acidobacteria_Subgroup 17_metagenome_metagenome_metagenome	0
Bacteria_Firmicutes_Clostridia_Clostridiales_Ruminococcaceae_DTU089	0
Bacteria_Firmicutes_Erysipelotrichia_Erysipelotrichales_Erysipelotrichaceae_Dielma	0
Bacteria_Firmicutes_Clostridia_Clostridiales_Ruminococcaceae_Harryflintia	0
Bacteria_Firmicutes_Clostridia_Clostridiales_Ruminococcaceae_Ruminiclostridium	0
Bacteria_Firmicutes_Clostridia_Clostridiales_Ruminococcaceae_Ruminococcaceae NK4A214 group	0
Bacteria_Firmicutes_Clostridia_DTU014_uncultured bacterium_DTU014 uncultured bacterium	0
Bacteria_Firmicutes_Clostridia_Clostridiales_Ruminococcaceae_Ruminococcaceae UCG-002	0
Bacteria_Firmicutes_Clostridia_Clostridiales_Family XIII_Anaerovorax	0
Bacteria_Firmicutes_Clostridia_Clostridiales_Clostridiales vadinBB60 group_Clostridiales vadinBB60 group gut metagenome	0
Bacteria_Firmicutes_Bacilli_Bacillales_Bacillaceae_Caldibacillus	0
Bacteria_Firmicutes_Negativicutes_Selenomonadales_Veillonellaceae_Veillonellaceae UC	0
Bacteria_Firmicutes_Bacilli_Bacillales_Family XII_Exiguobacterium	0
Bacteria_Firmicutes_Clostridia_Clostridiales_Ruminococcaceae_Ruminococcaceae UCG-010	0
Bacteria_Proteobacteria_Alphaproteobacteria_Rhizobiales_Xanthobacteraceae_Xanthobacteraceae UC	0
Bacteria_Proteobacteria_Alphaproteobacteria_Rhizobiales_Rhizobiaceae_Phyllobacterium	0
Bacteria_Firmicutes_Bacilli_Bacillales_Listeriaceae_Listeria	0
Bacteria_Firmicutes_Bacilli_Lactobacillales_Enterococcaceae_Vagococcus	0
Bacteria_Proteobacteria_Alphaproteobacteria_Caulobacterales_Caulobacteraceae_Brevundimonas	0
Bacteria_Planctomycetes_vadinHA49_metagenome_metagenome_metagenome	0
Bacteria_Planctomycetes_Planctomycetacia_Pirellulales_Pirellulaceae_Pirellulaceae uncultured	0
Bacteria_Planctomycetes_Pla4 lineage_uncultured bacterium_uncultured bacterium_uncultured bacterium uncultured bacterium	0
Bacteria_Firmicutes_Bacilli_Lactobacillales_Lactobacillaceae_Pediococcus	0
Bacteria_Planctomycetes_Phycisphaerae_Phycisphaerales_Phycisphaeraceae_SM1A02	0
Bacteria_Planctomycetes_Phycisphaerae_Phycisphaerales_Phycisphaeraceae_CL500-3	0
Bacteria_Planctomycetes_OM190_uncultured bacterium_uncultured bacterium_uncultured bacterium uncultured bacterium	0
Bacteria_Planctomycetes_OM190_UC_UC_UC	0
Bacteria_Patescibacteria_Parcubacteria_metagenome_metagenome_metagenome	0
Bacteria_Patescibacteria_Parcubacteria_Candidatus Campbellbacteria_uncultured bacterium_Candidatus Campbellbacteria uncultured bacterium	0
Bacteria_Patescibacteria_ABY1_Candidatus Magasanikbacteria_metagenome_metagenome	0
Bacteria_Firmicutes_Bacilli_Lactobacillales_Leuconostocaceae_Weissella	0
Bacteria_Nitrospirae_Nitrospira_Nitrospirales_Nitrospiraceae_Nitrospira	0
Bacteria_Lentisphaerae_Lentisphaeria_Victivallales_Victivallaceae_Victivallis	0
Bacteria_Firmicutes_Clostridia_Clostridiales_Clostridiales vadinBB60 group_Clostridiales uncultured bacterium	0
Bacteria_Fusobacteria_Fusobacteriia_Fusobacteriales_Fusobacteriaceae_Cetobacterium	0
Bacteria_Verrucomicrobia_Verrucomicrobiae_Verrucomicrobiales_Rubritaleaceae_Luteolibacter	0

[truncated: 4 more sheets: Table S10, TableS11, Table S12, Table S13]
